# Supplementary material for: Assessing the realism of clean energy projections
Source: Royal Society of Chemistry journal article supplement (doi:10.1039/d4ee00747f), 2024-01-01

(a):  $\frac{\text{Annual demand driven by CETs}}{\text{Total production in 2020}}$

(b):  $\frac{\text{Annual demand driven by CETs}}{\text{Demand driven by CETs in 2020}}$

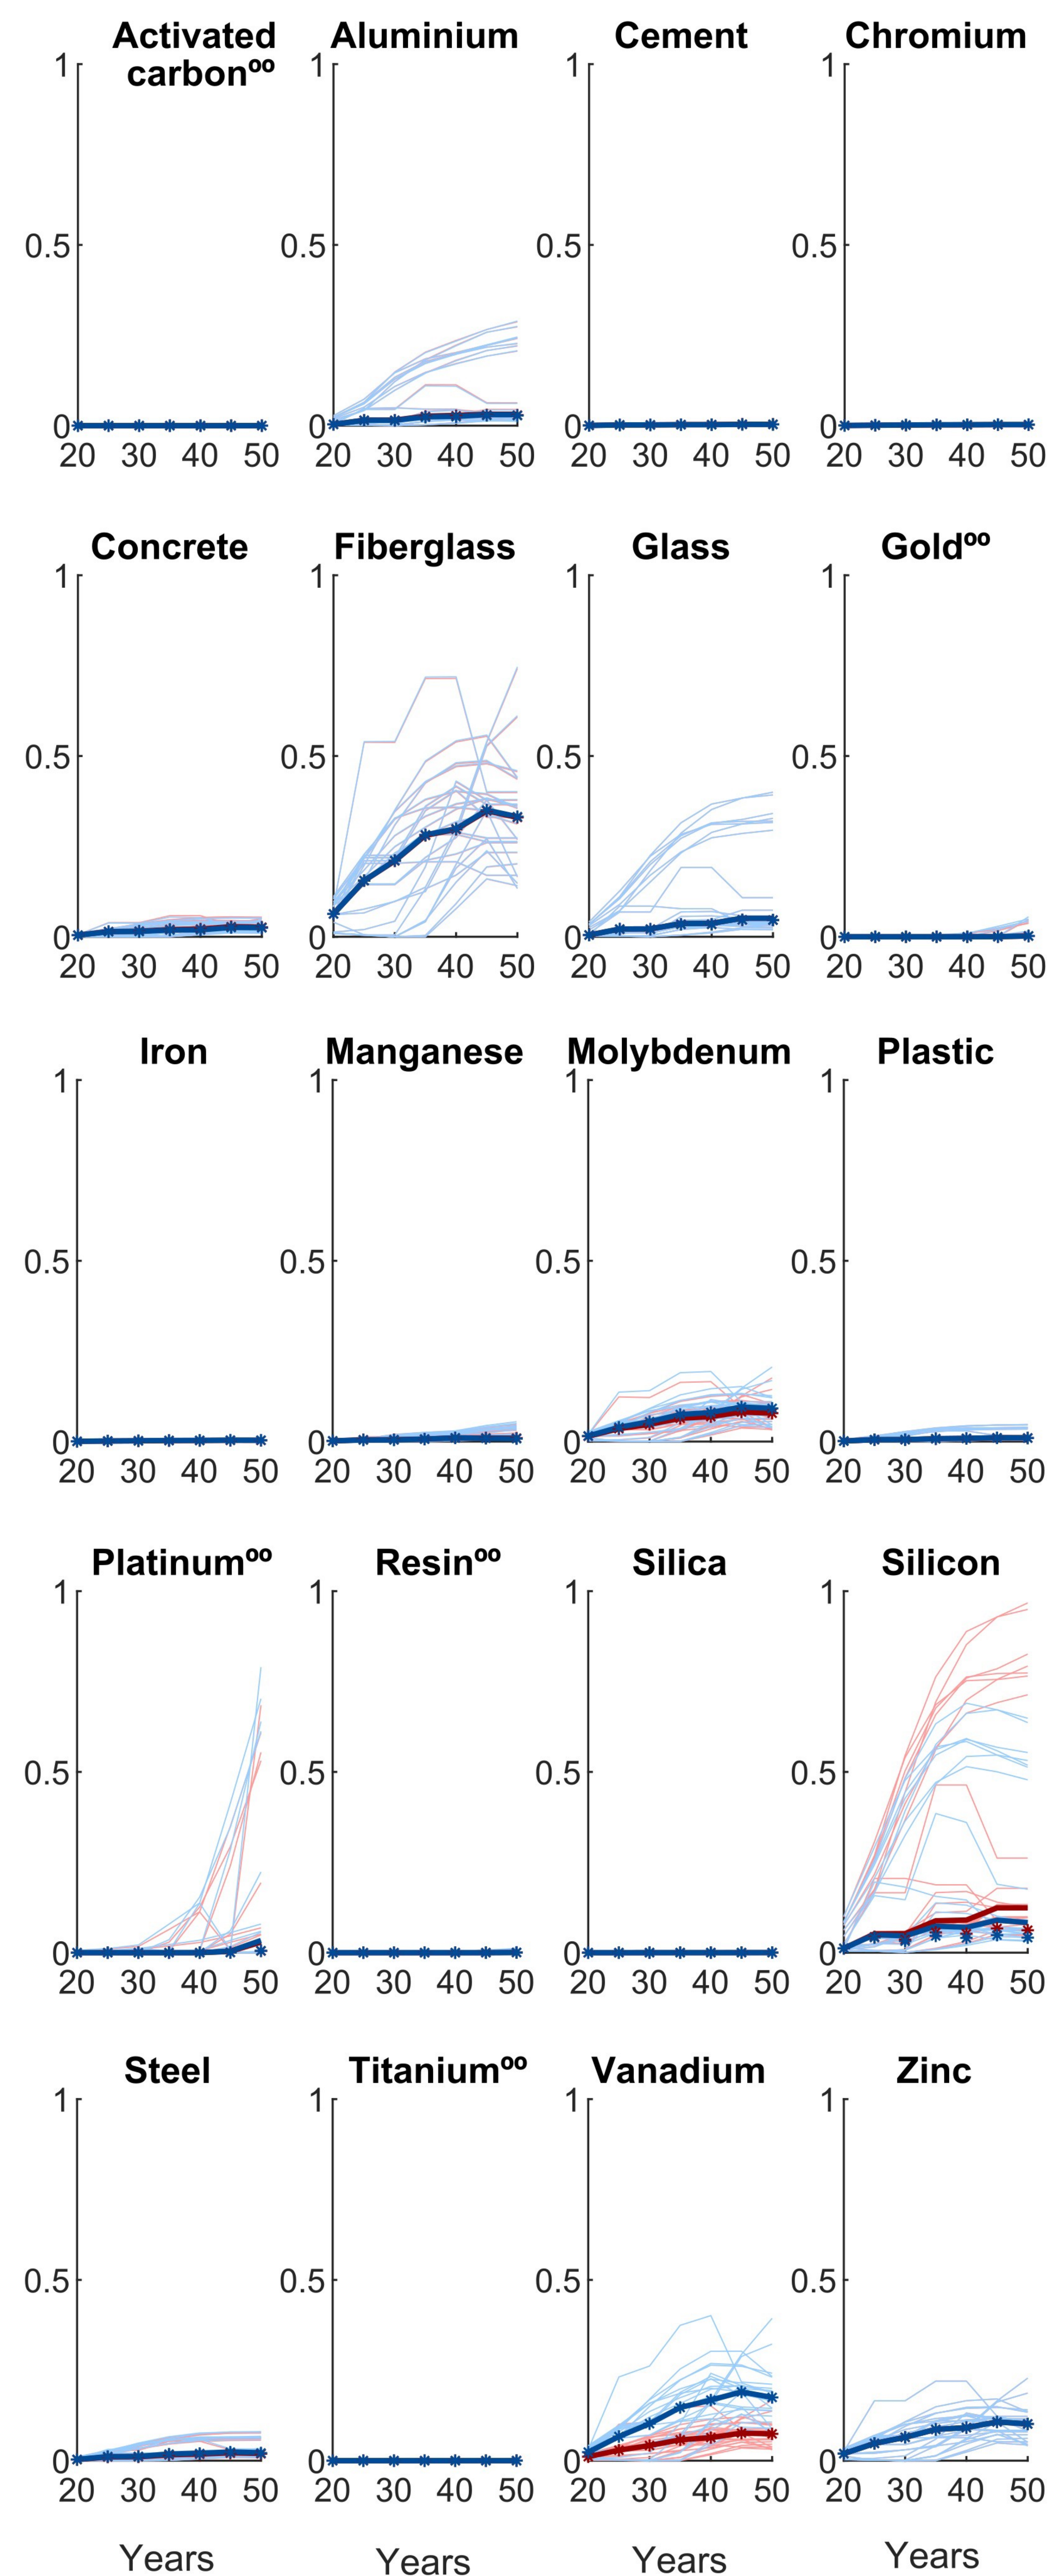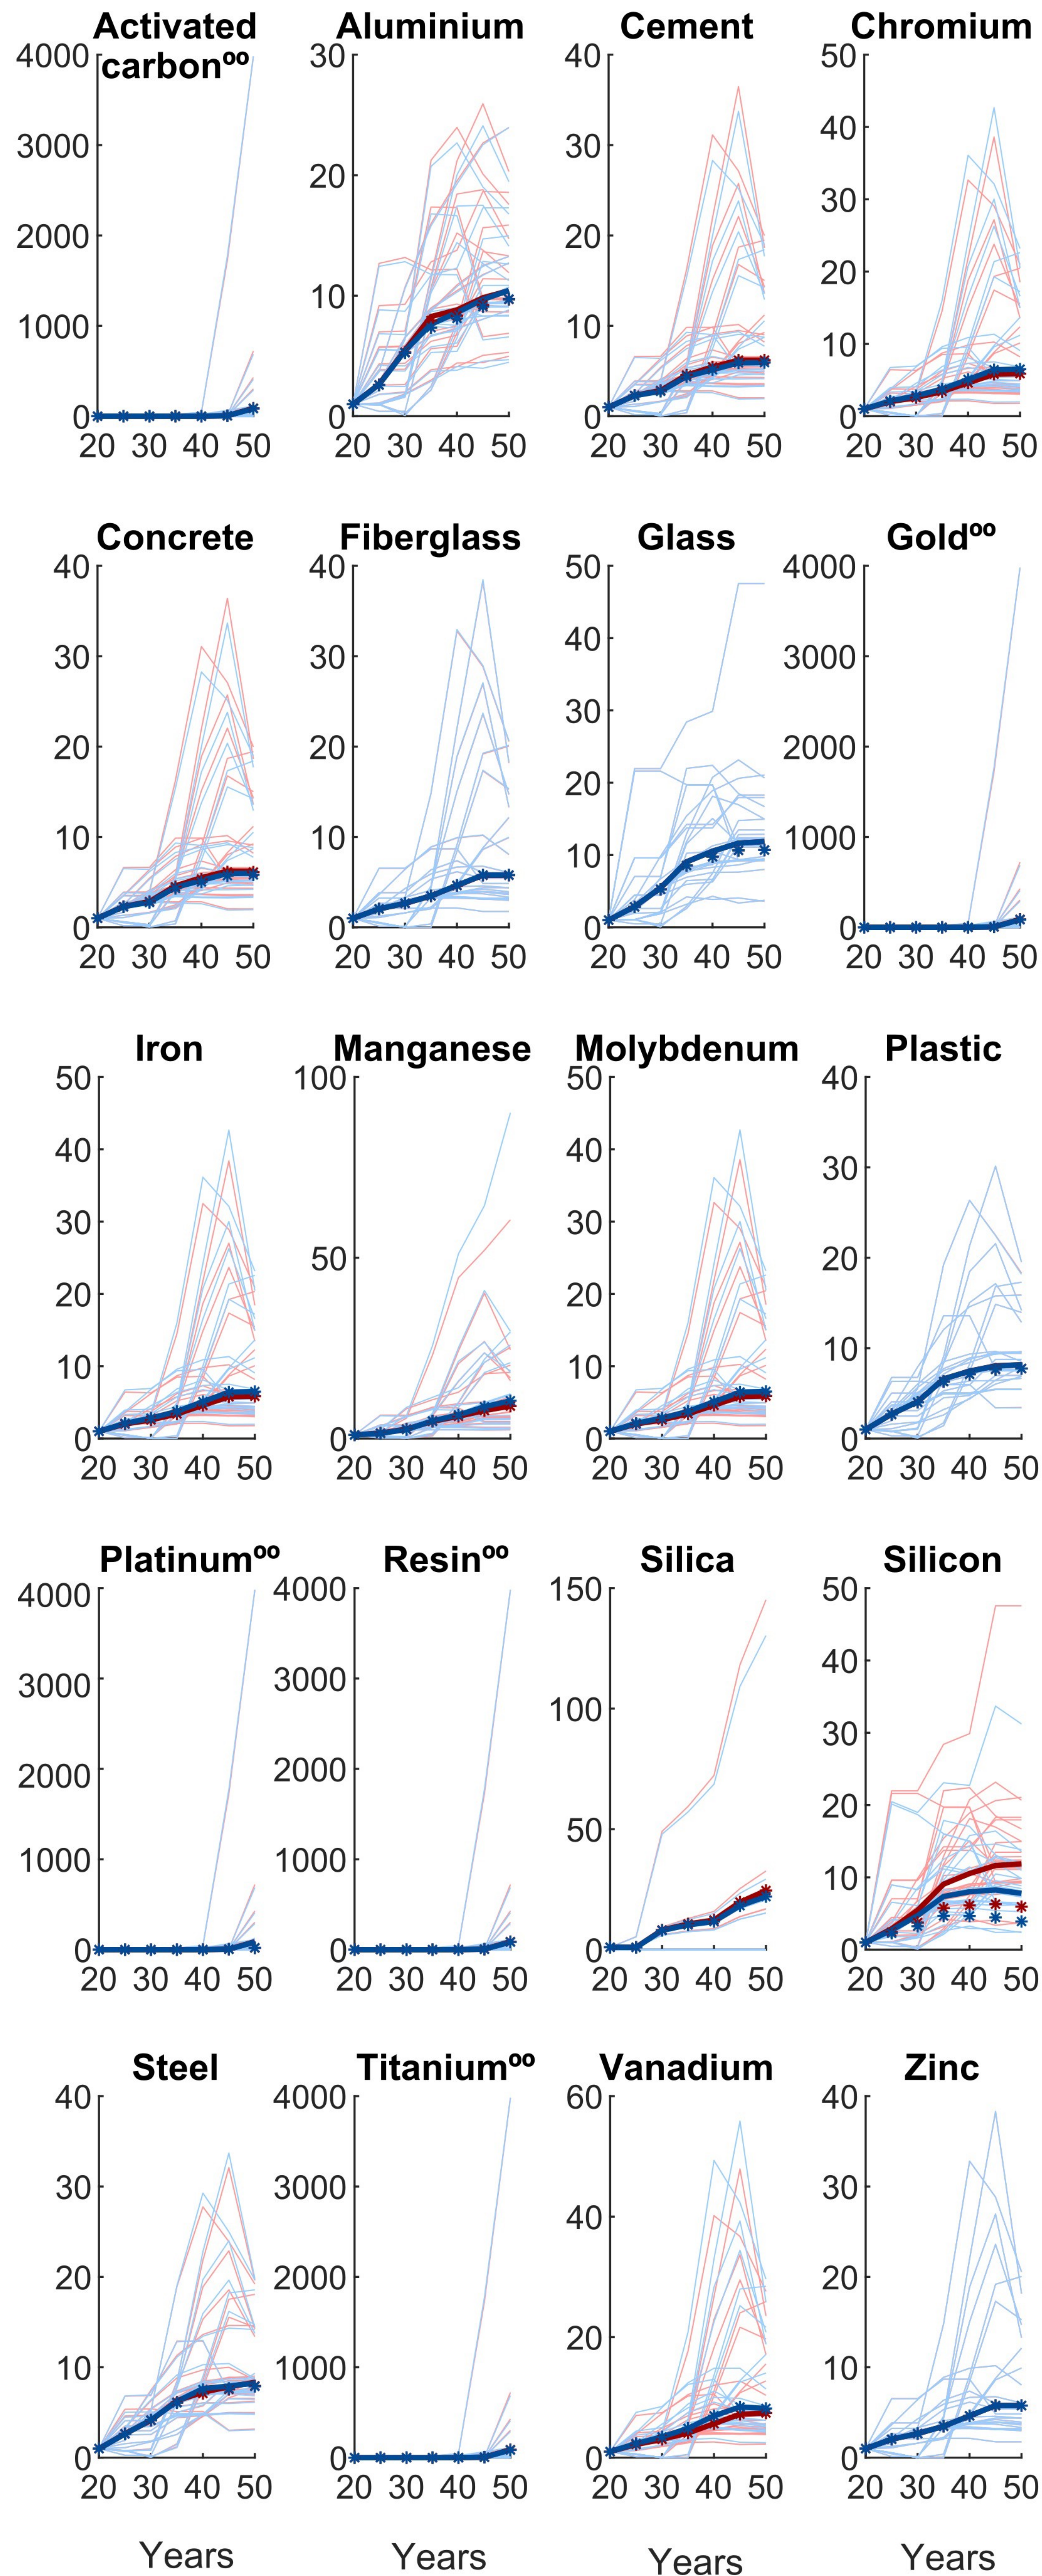

Supplement: d4ee00747f4.pdf [file d4ee00747f4.pdf]
