# Supplementary material for: Assessing the realism of clean energy projections
Source: Royal Society of Chemistry journal article supplement (doi:10.1039/d4ee00747f), 2024-01-01
Supplement: d4ee00747f7.pdf [file d4ee00747f7.pdf]

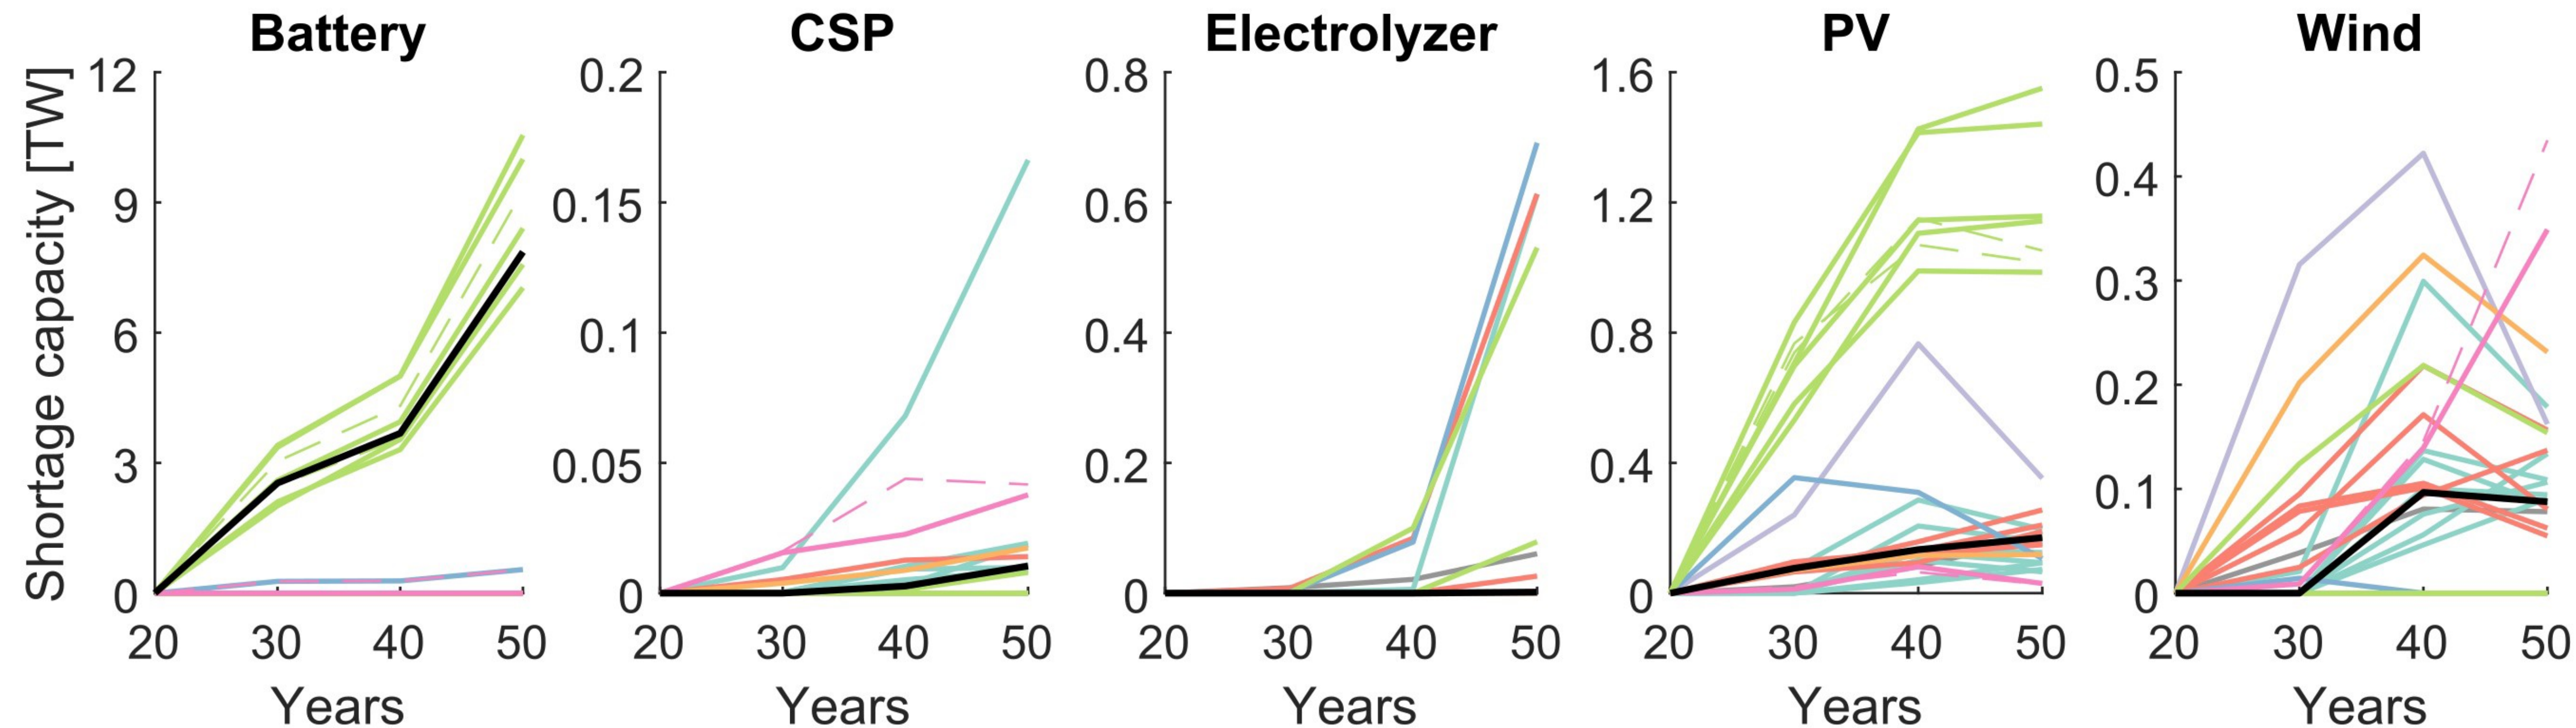

| Targets           | IAMs                 |                       |                   |
|-------------------|----------------------|-----------------------|-------------------|
| Below 1.5         | REMIND-MAgPIE1.7-3.0 | WITCH-GLOBIOM 4.4     |                   |
| 1.5 Low overshoot | GCAM 4.2             | MESSAGE-GLOBIOM 1.0   | POLES ADVANCE     |
|                   | IMAGE 3.0.1          | MESSAGEix-GLOBIOM 1.0 | WITCH-GLOBIOM 4.4 |
|                   | MERGE-ETL 6.0        | REMIND-MAgPIE1.7-3.0  | Median            |
