# Supplementary figures and images for: Assessing the realism of clean energy projections
Source: Royal Society of Chemistry journal article supplement (doi:10.1039/d4ee00747f), 2024-01-01

Annual added capacity [TW/year]

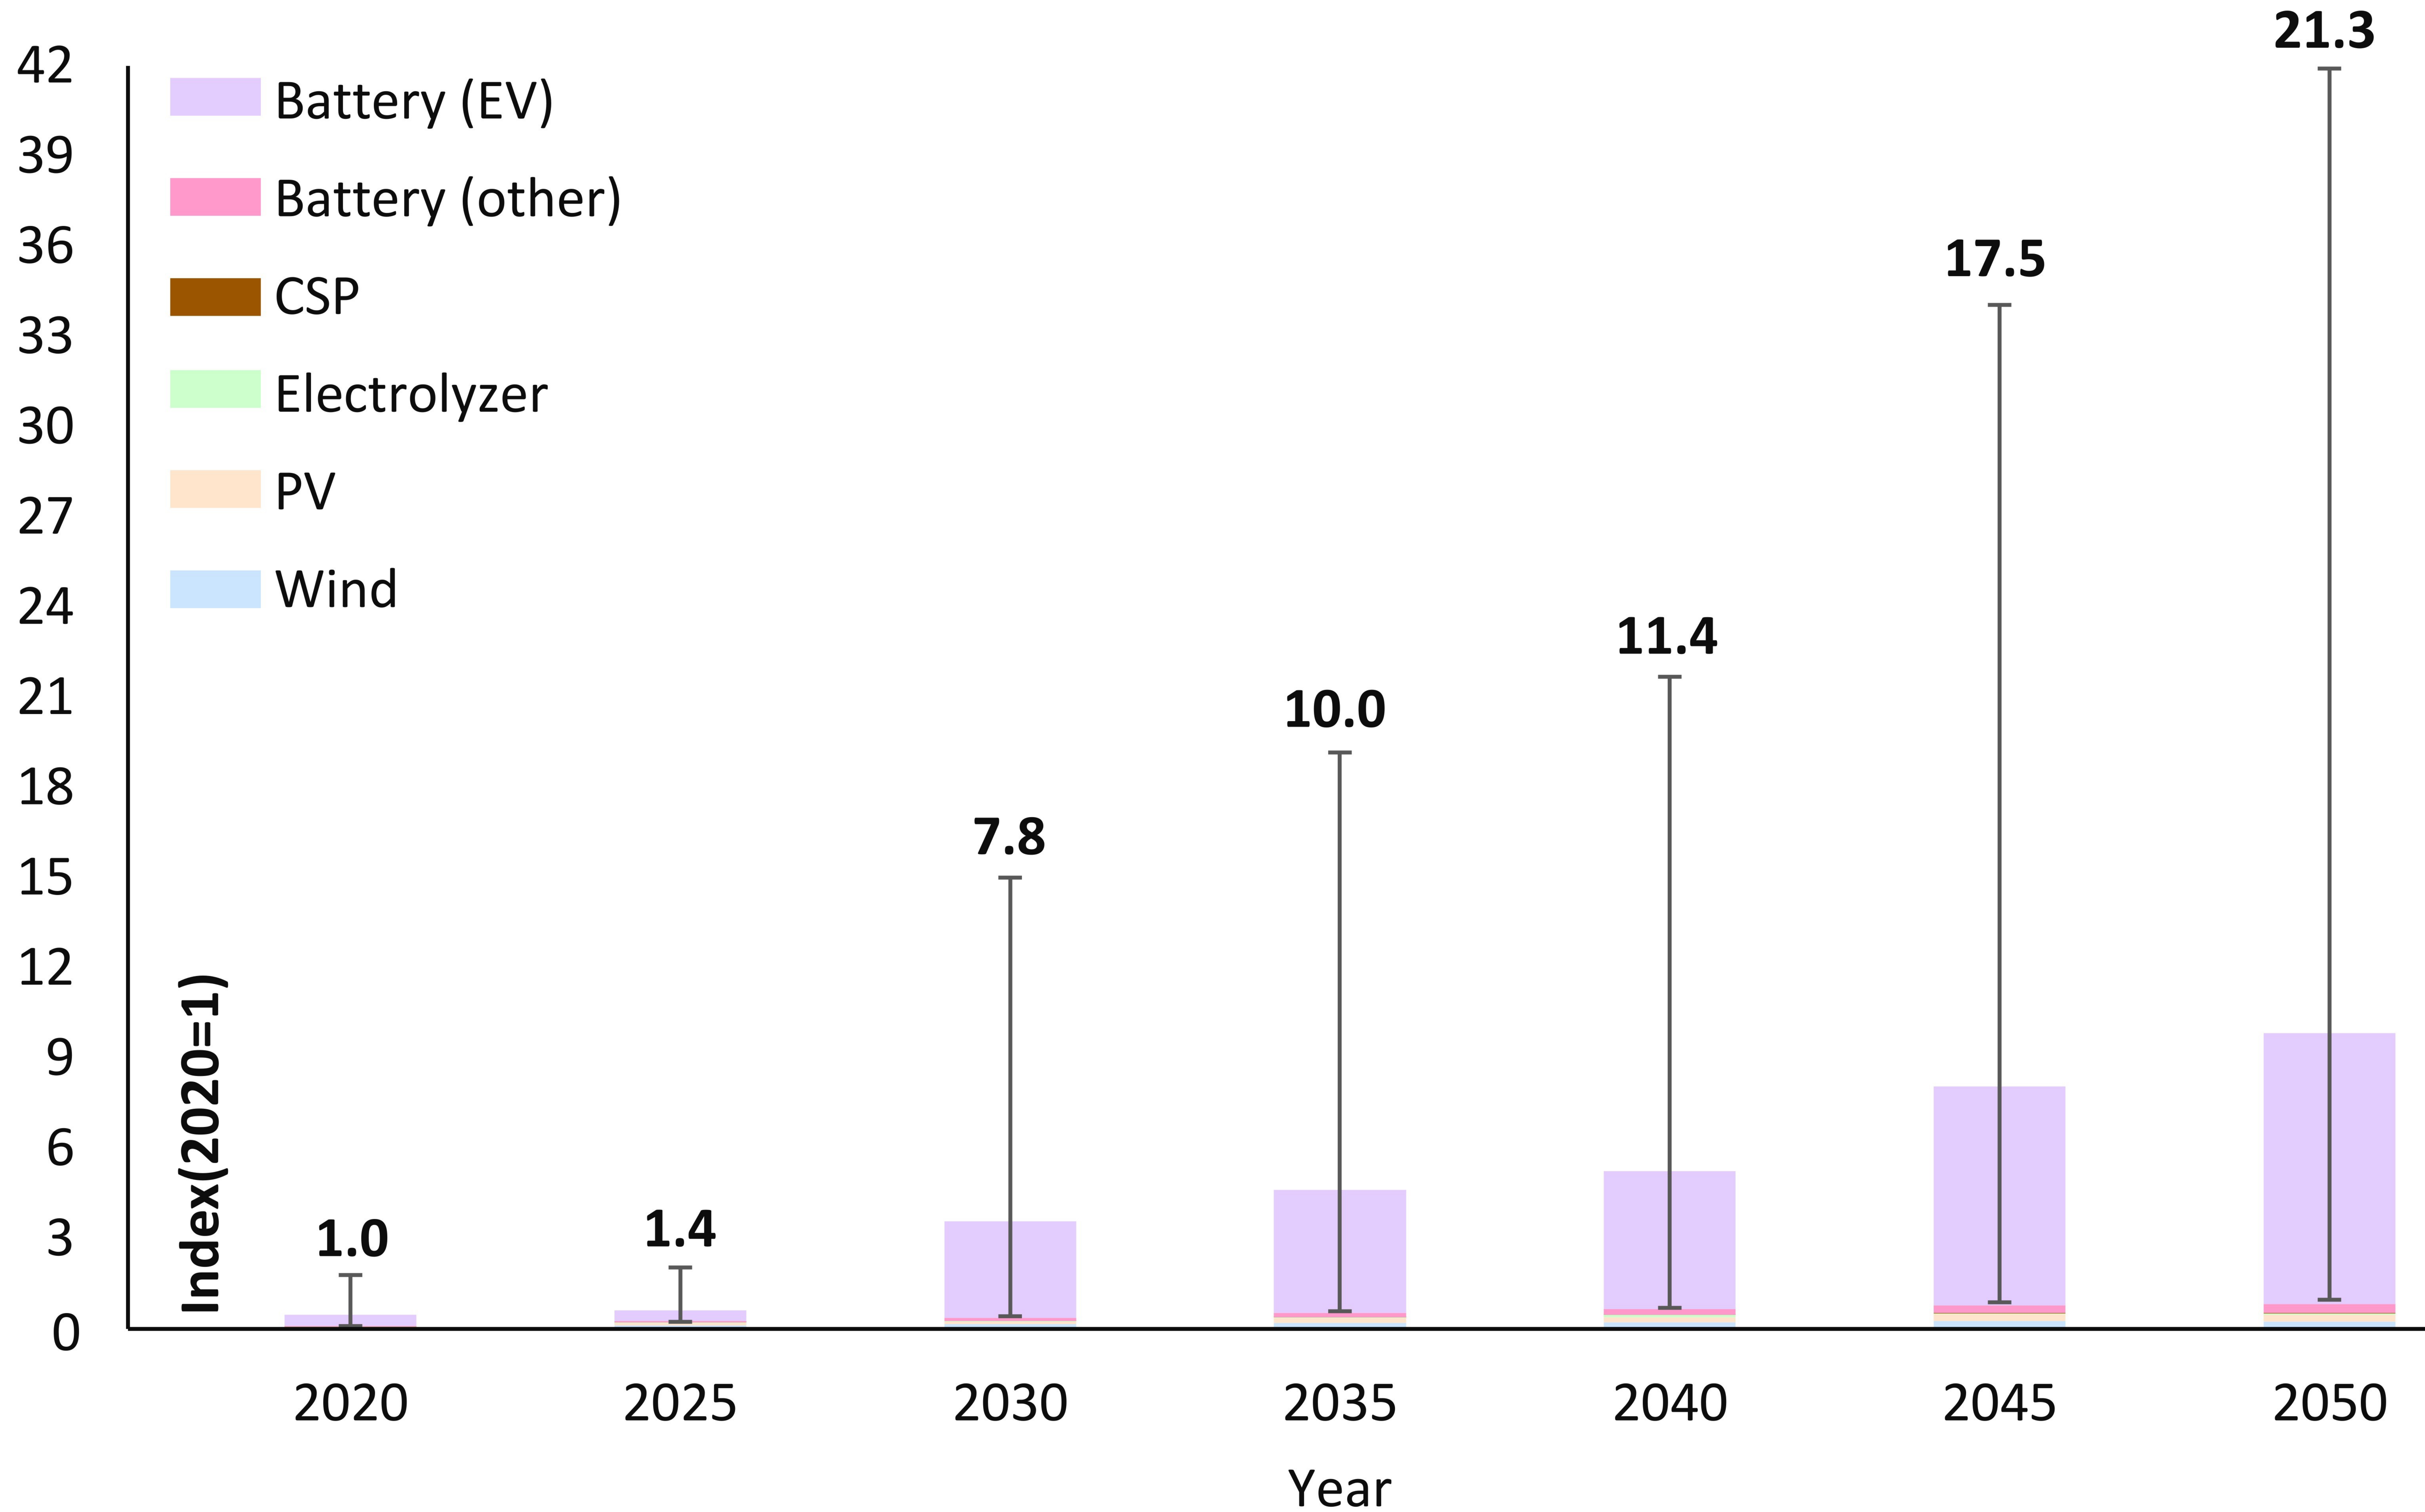

Supplement: d4ee00747f2.pdf [file d4ee00747f2.pdf]

**(a) Battery (Stationary)**

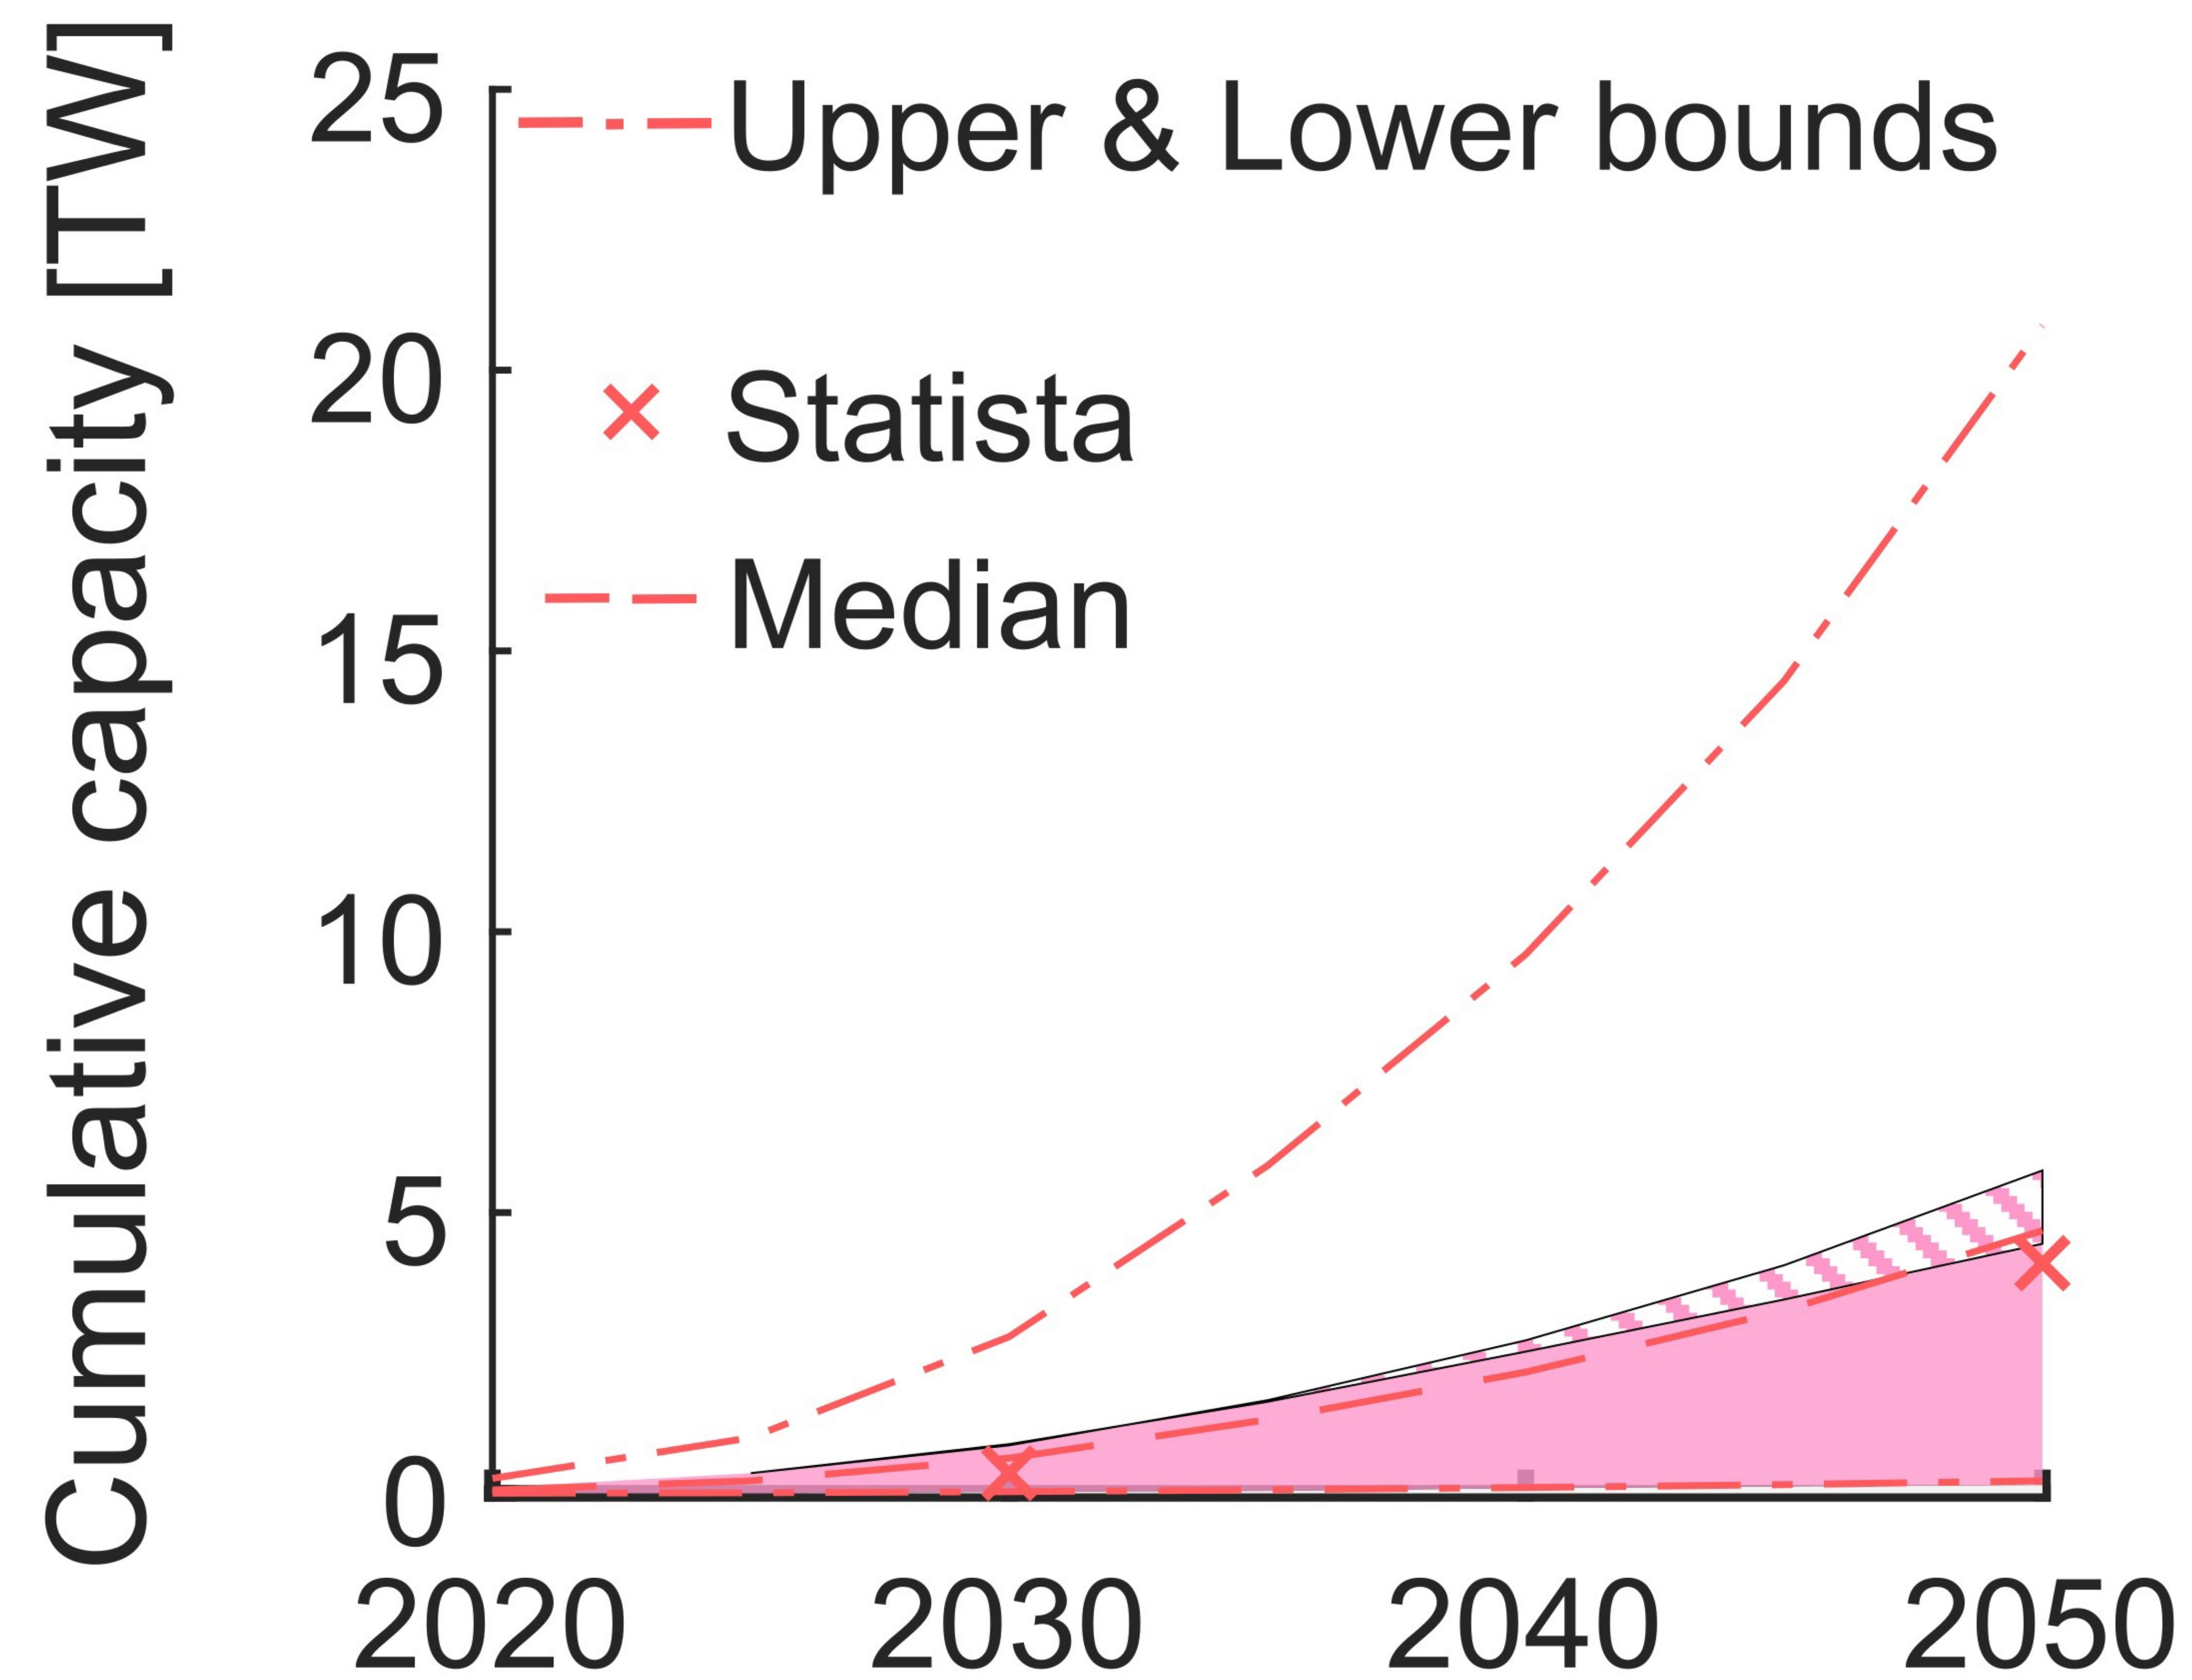

**(b) Battery (EV)**

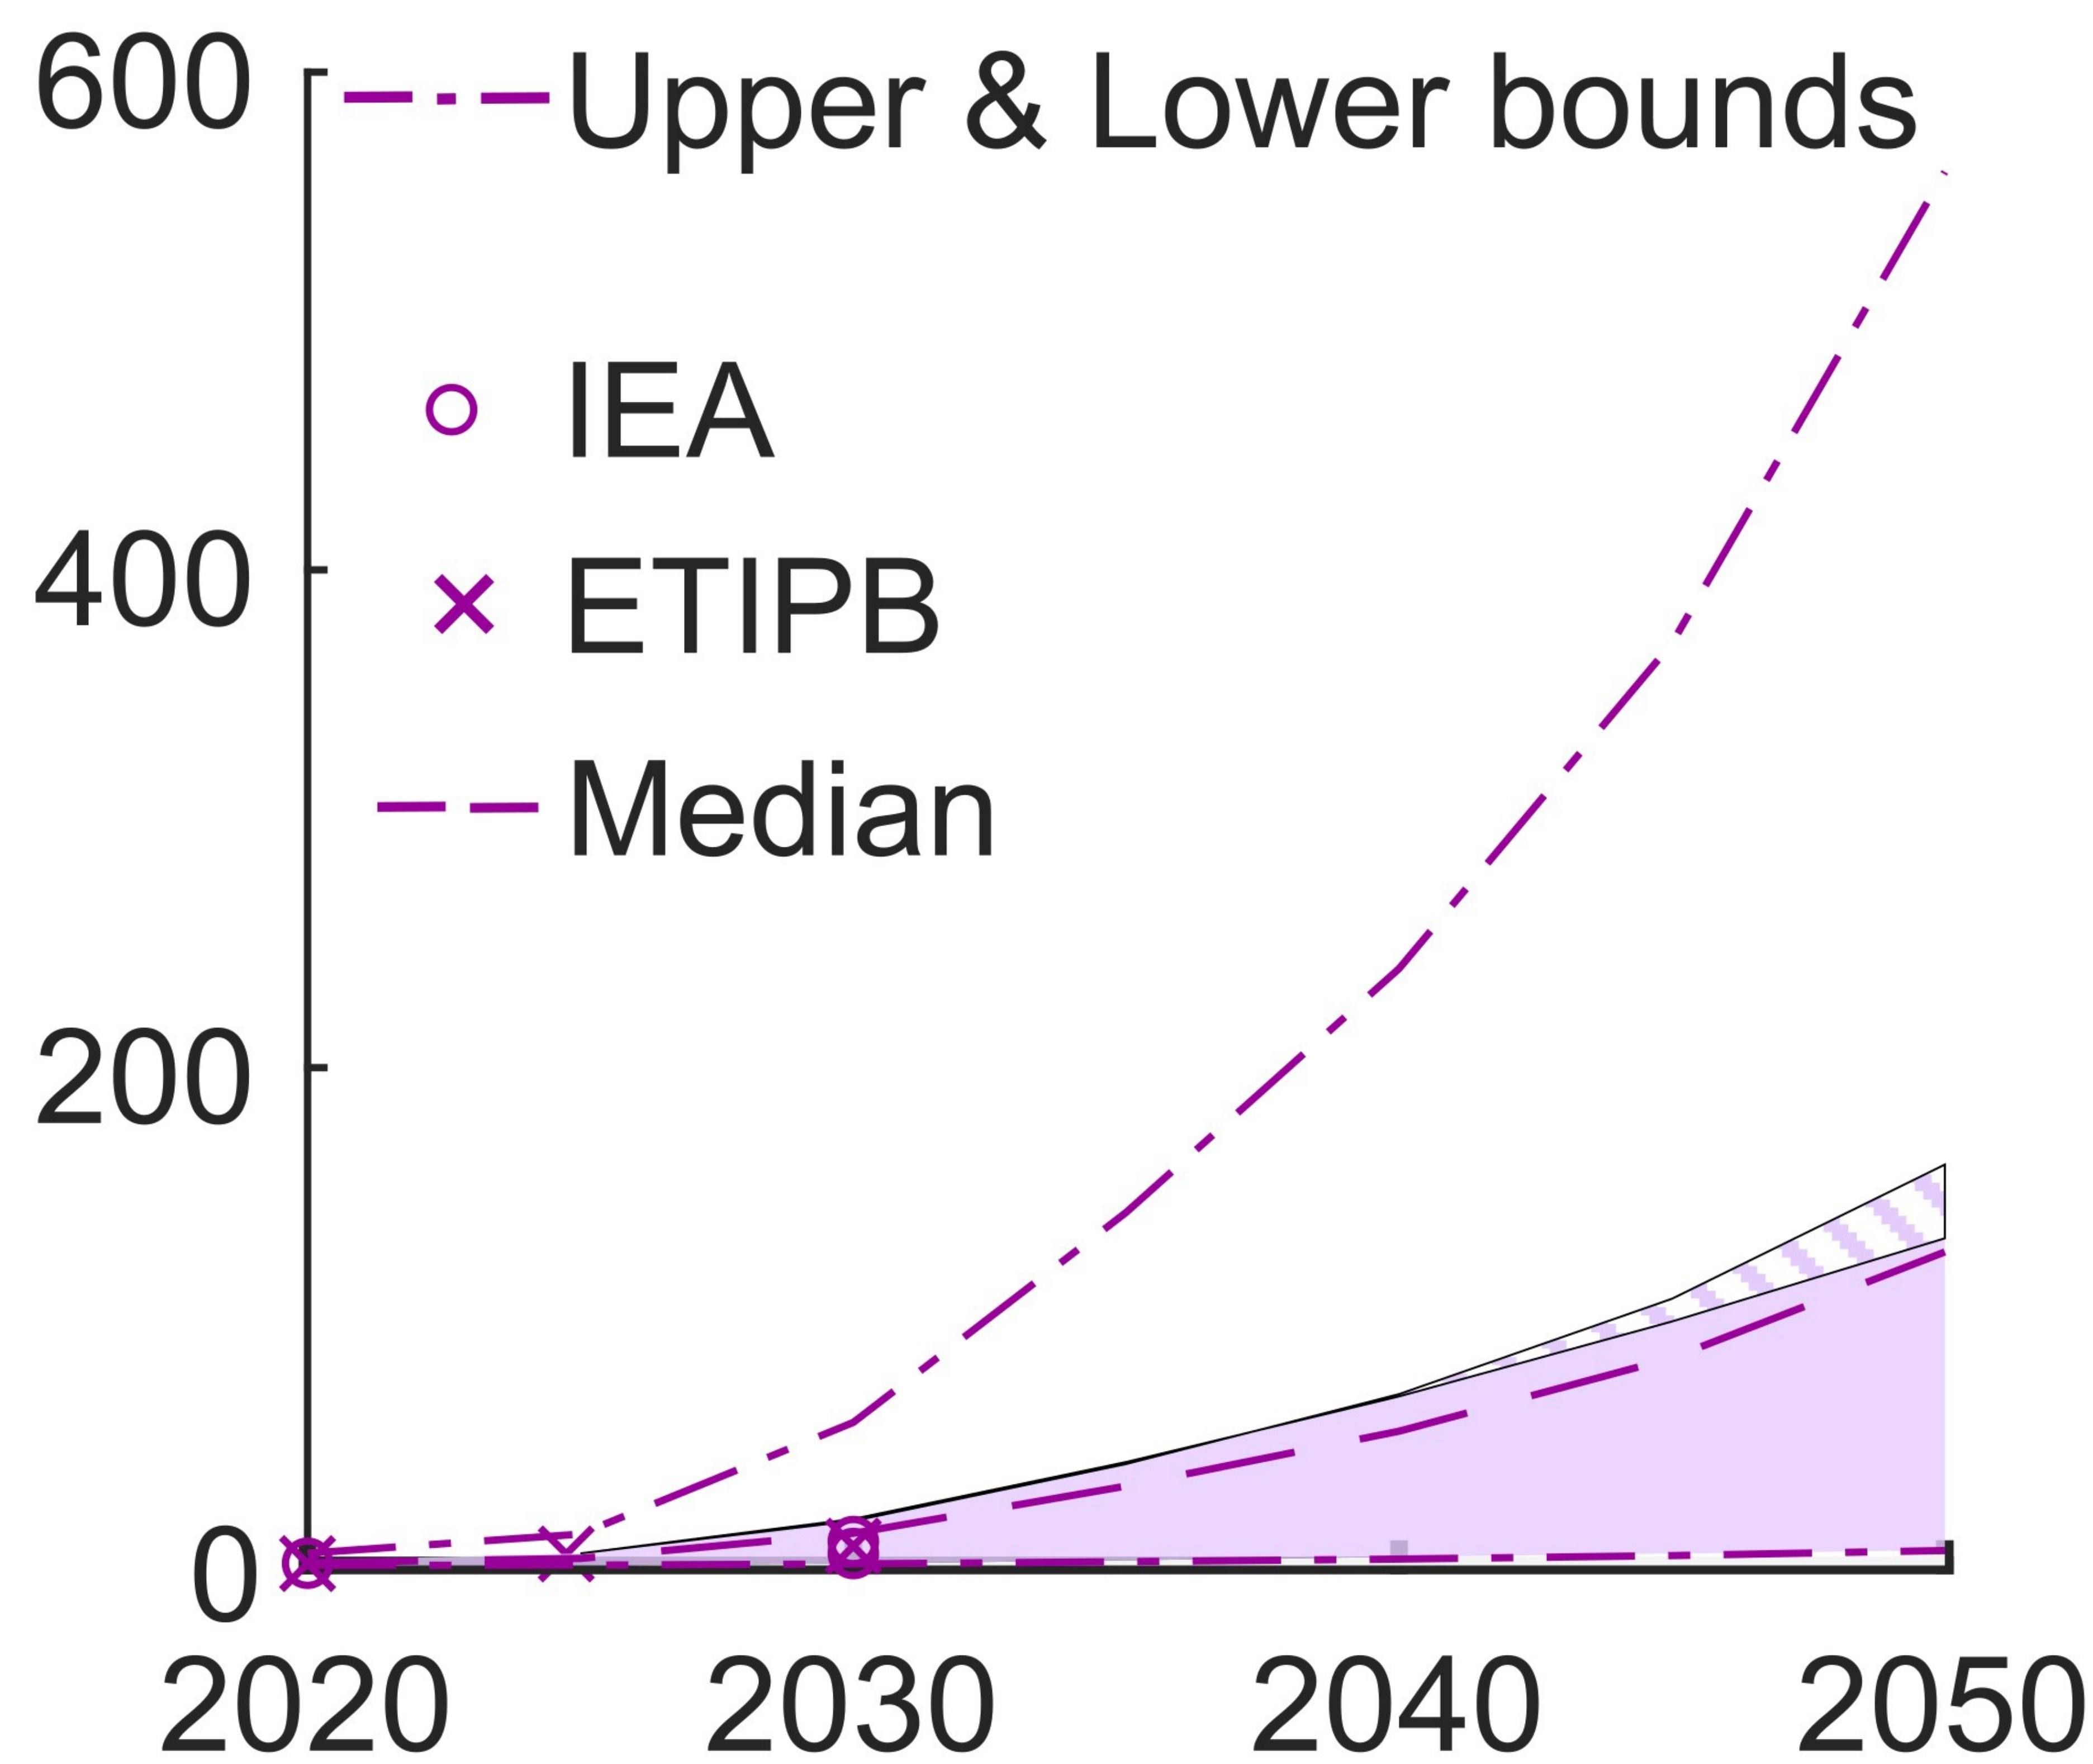

**(c) CSP**

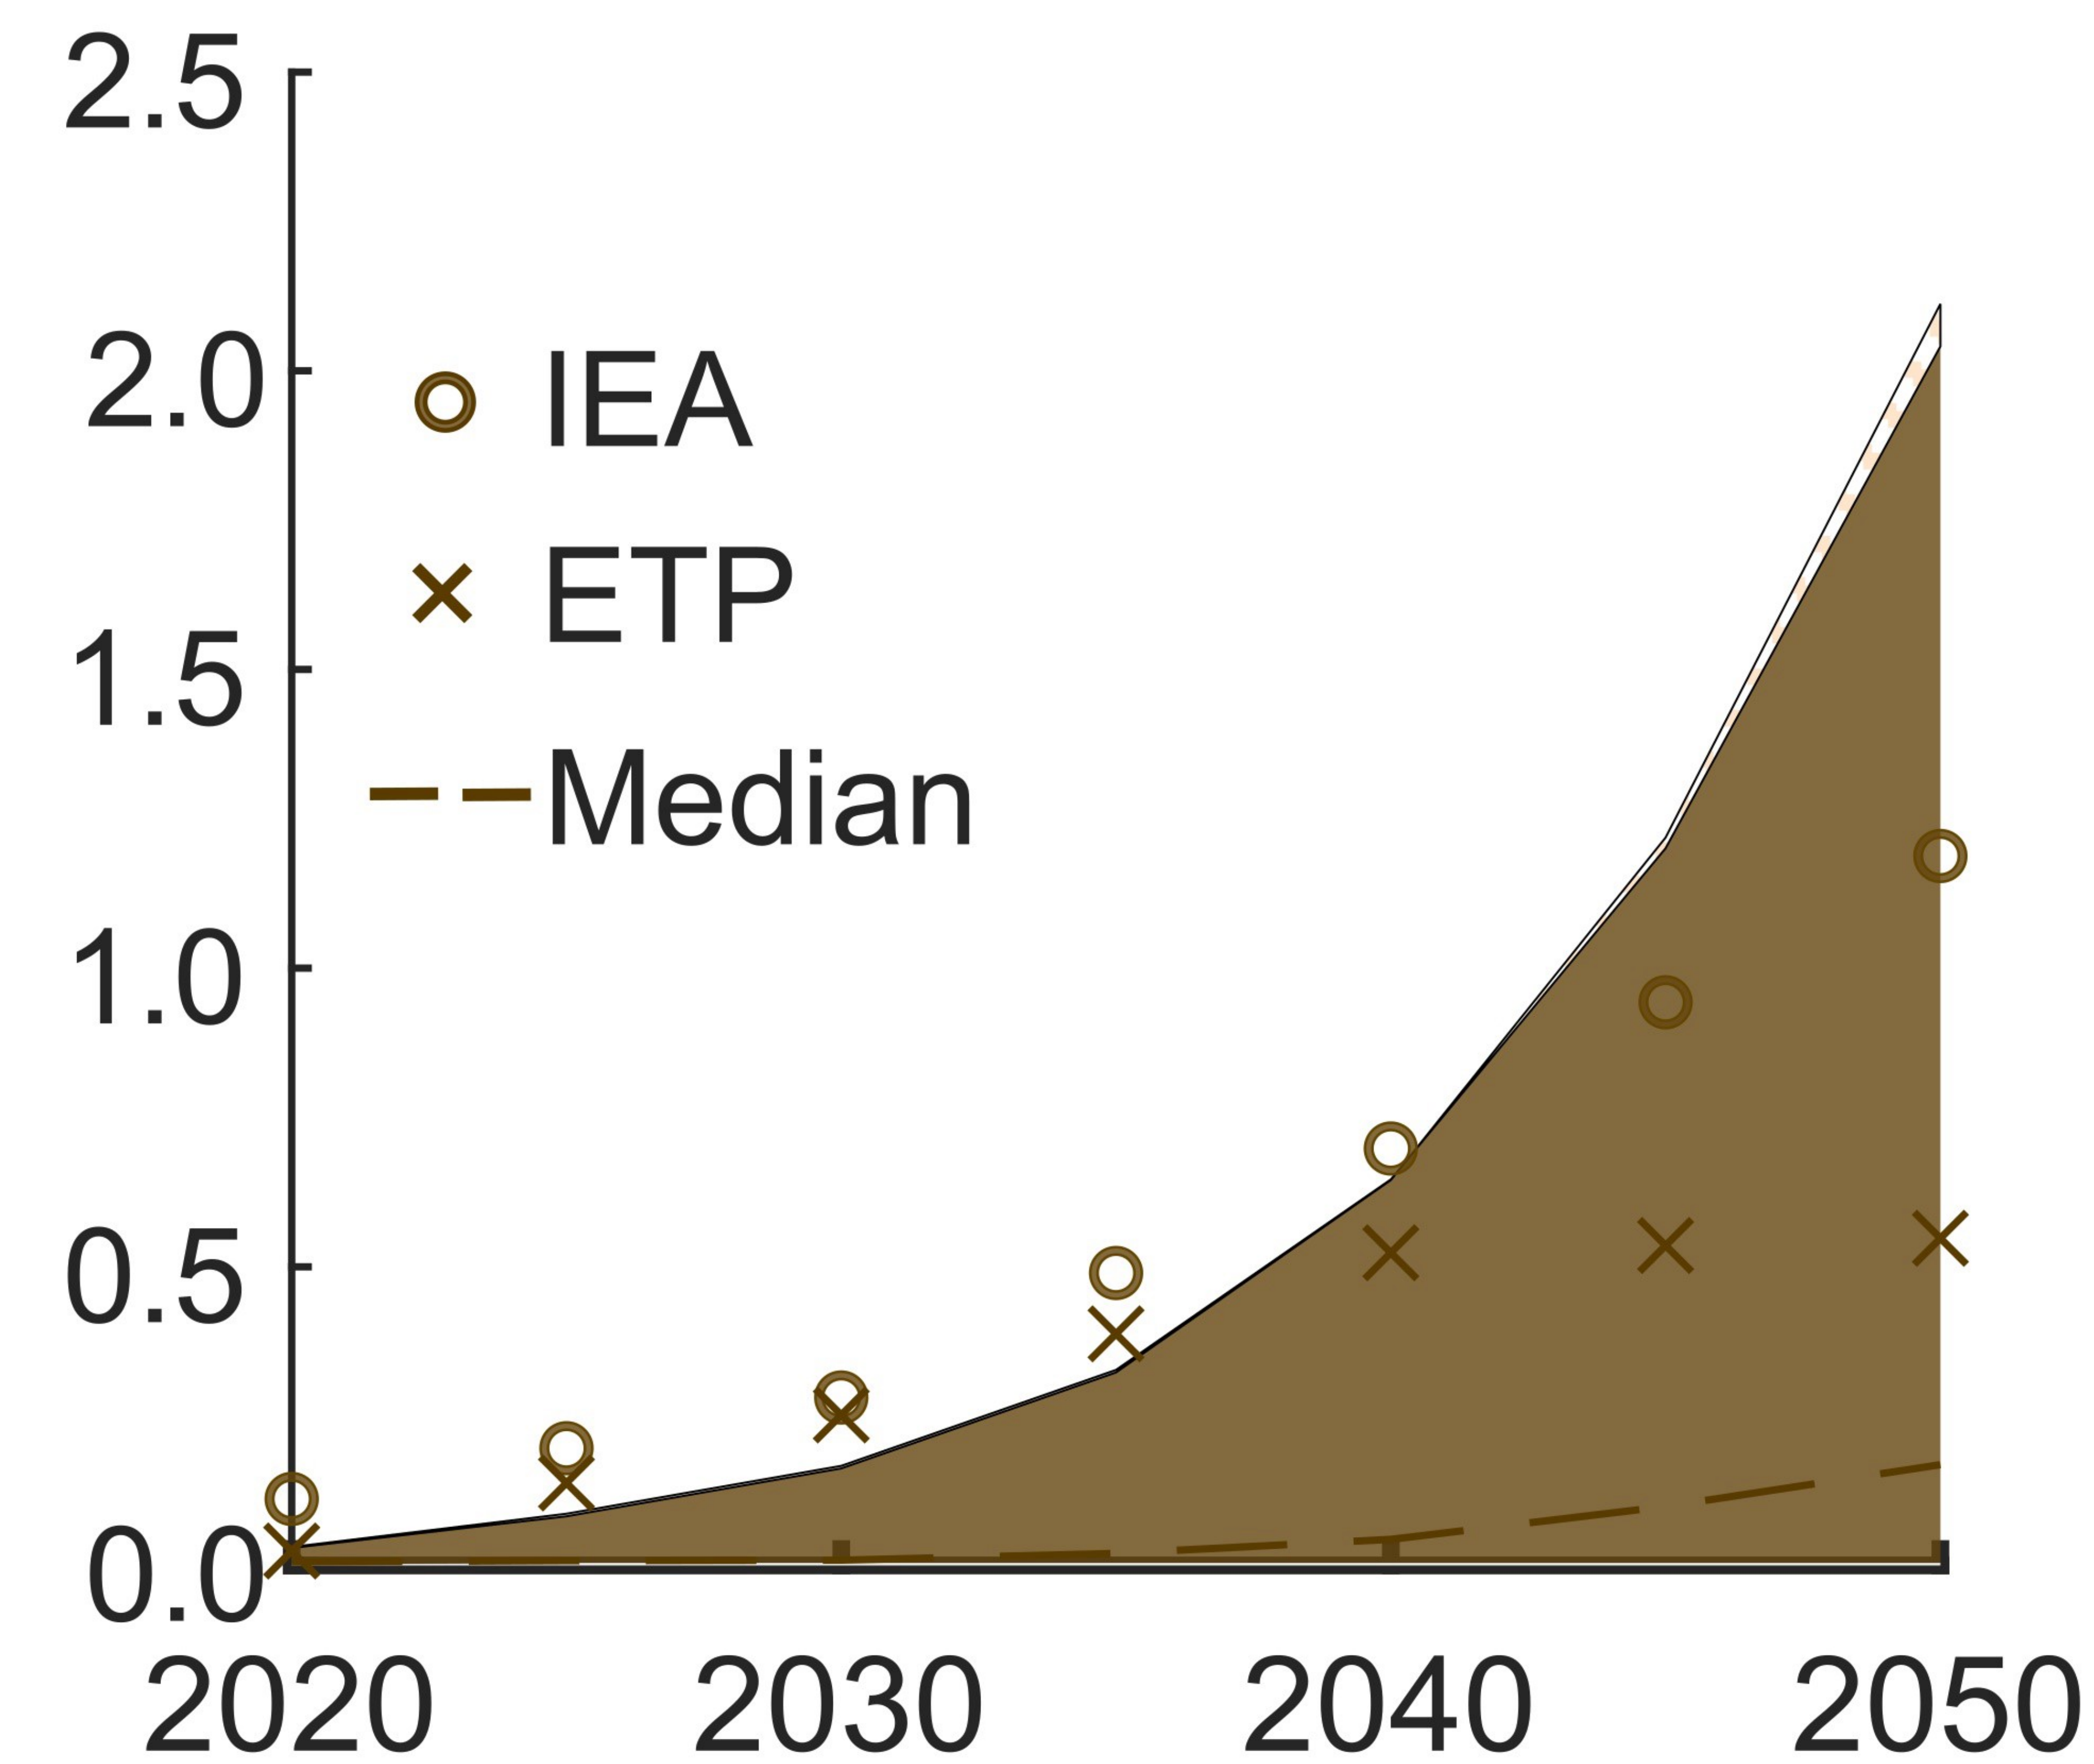

**(d) Electrolyzer**

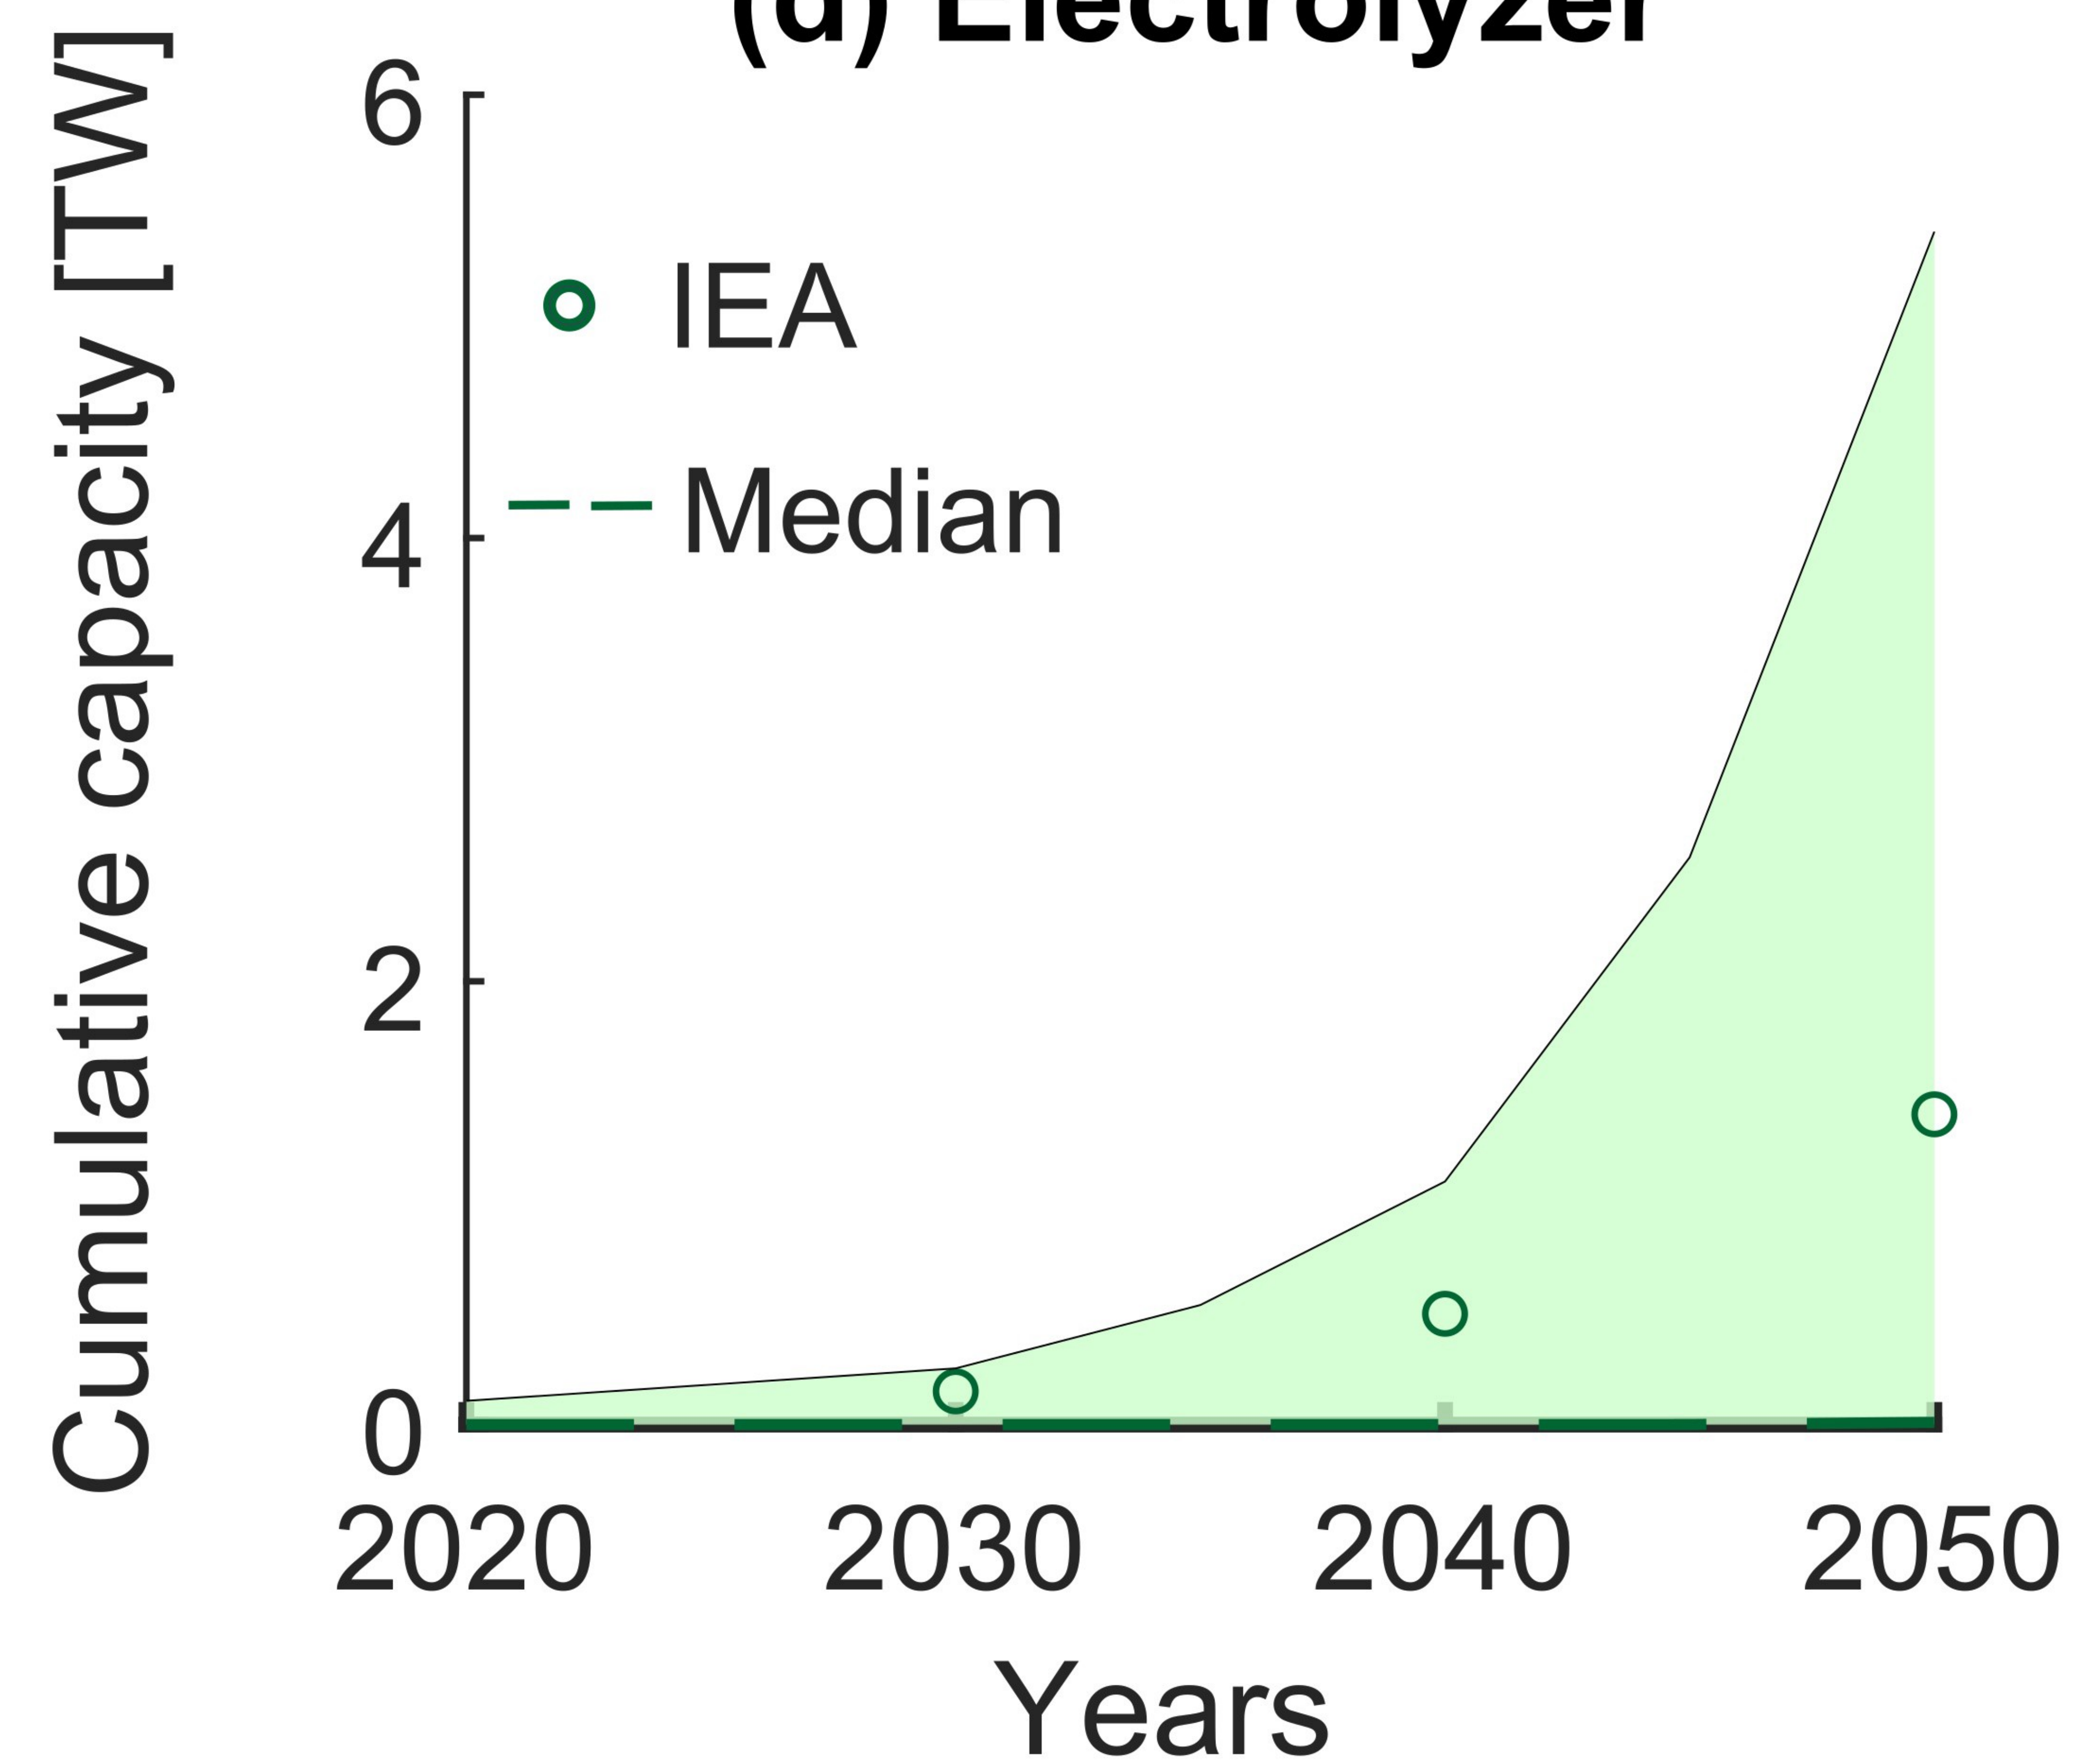

**(e) PV**

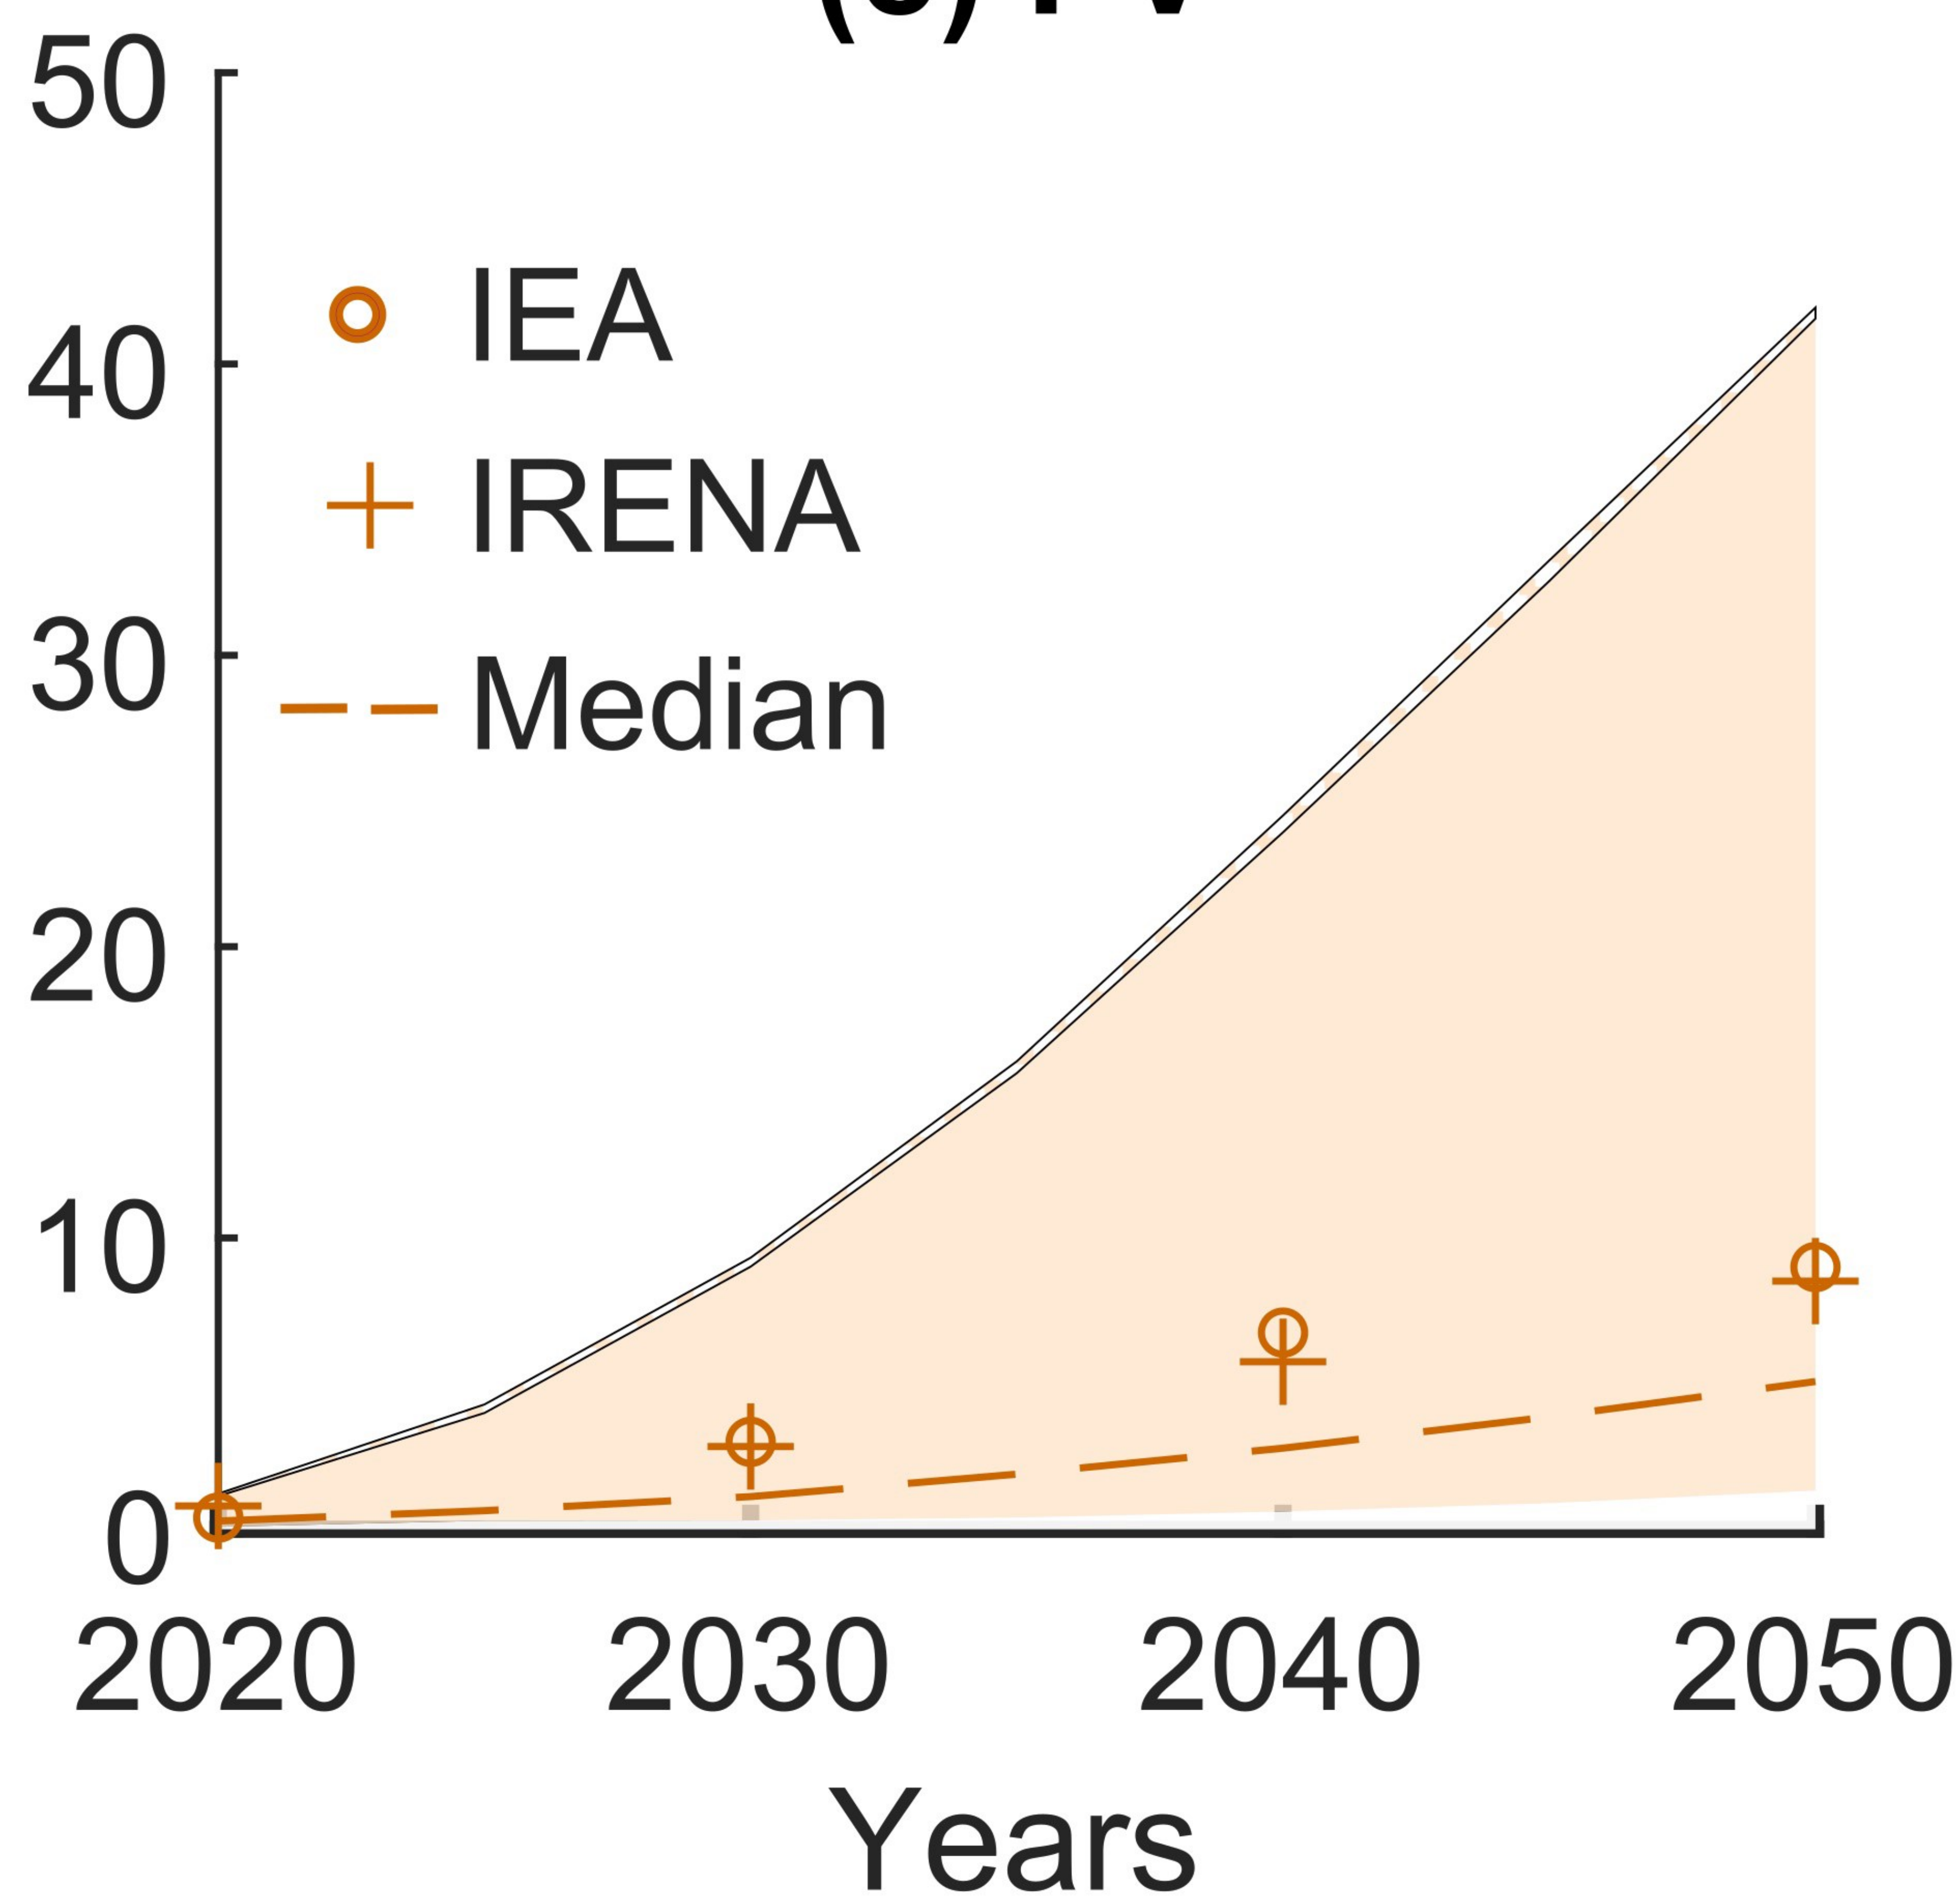

**(f) Wind**

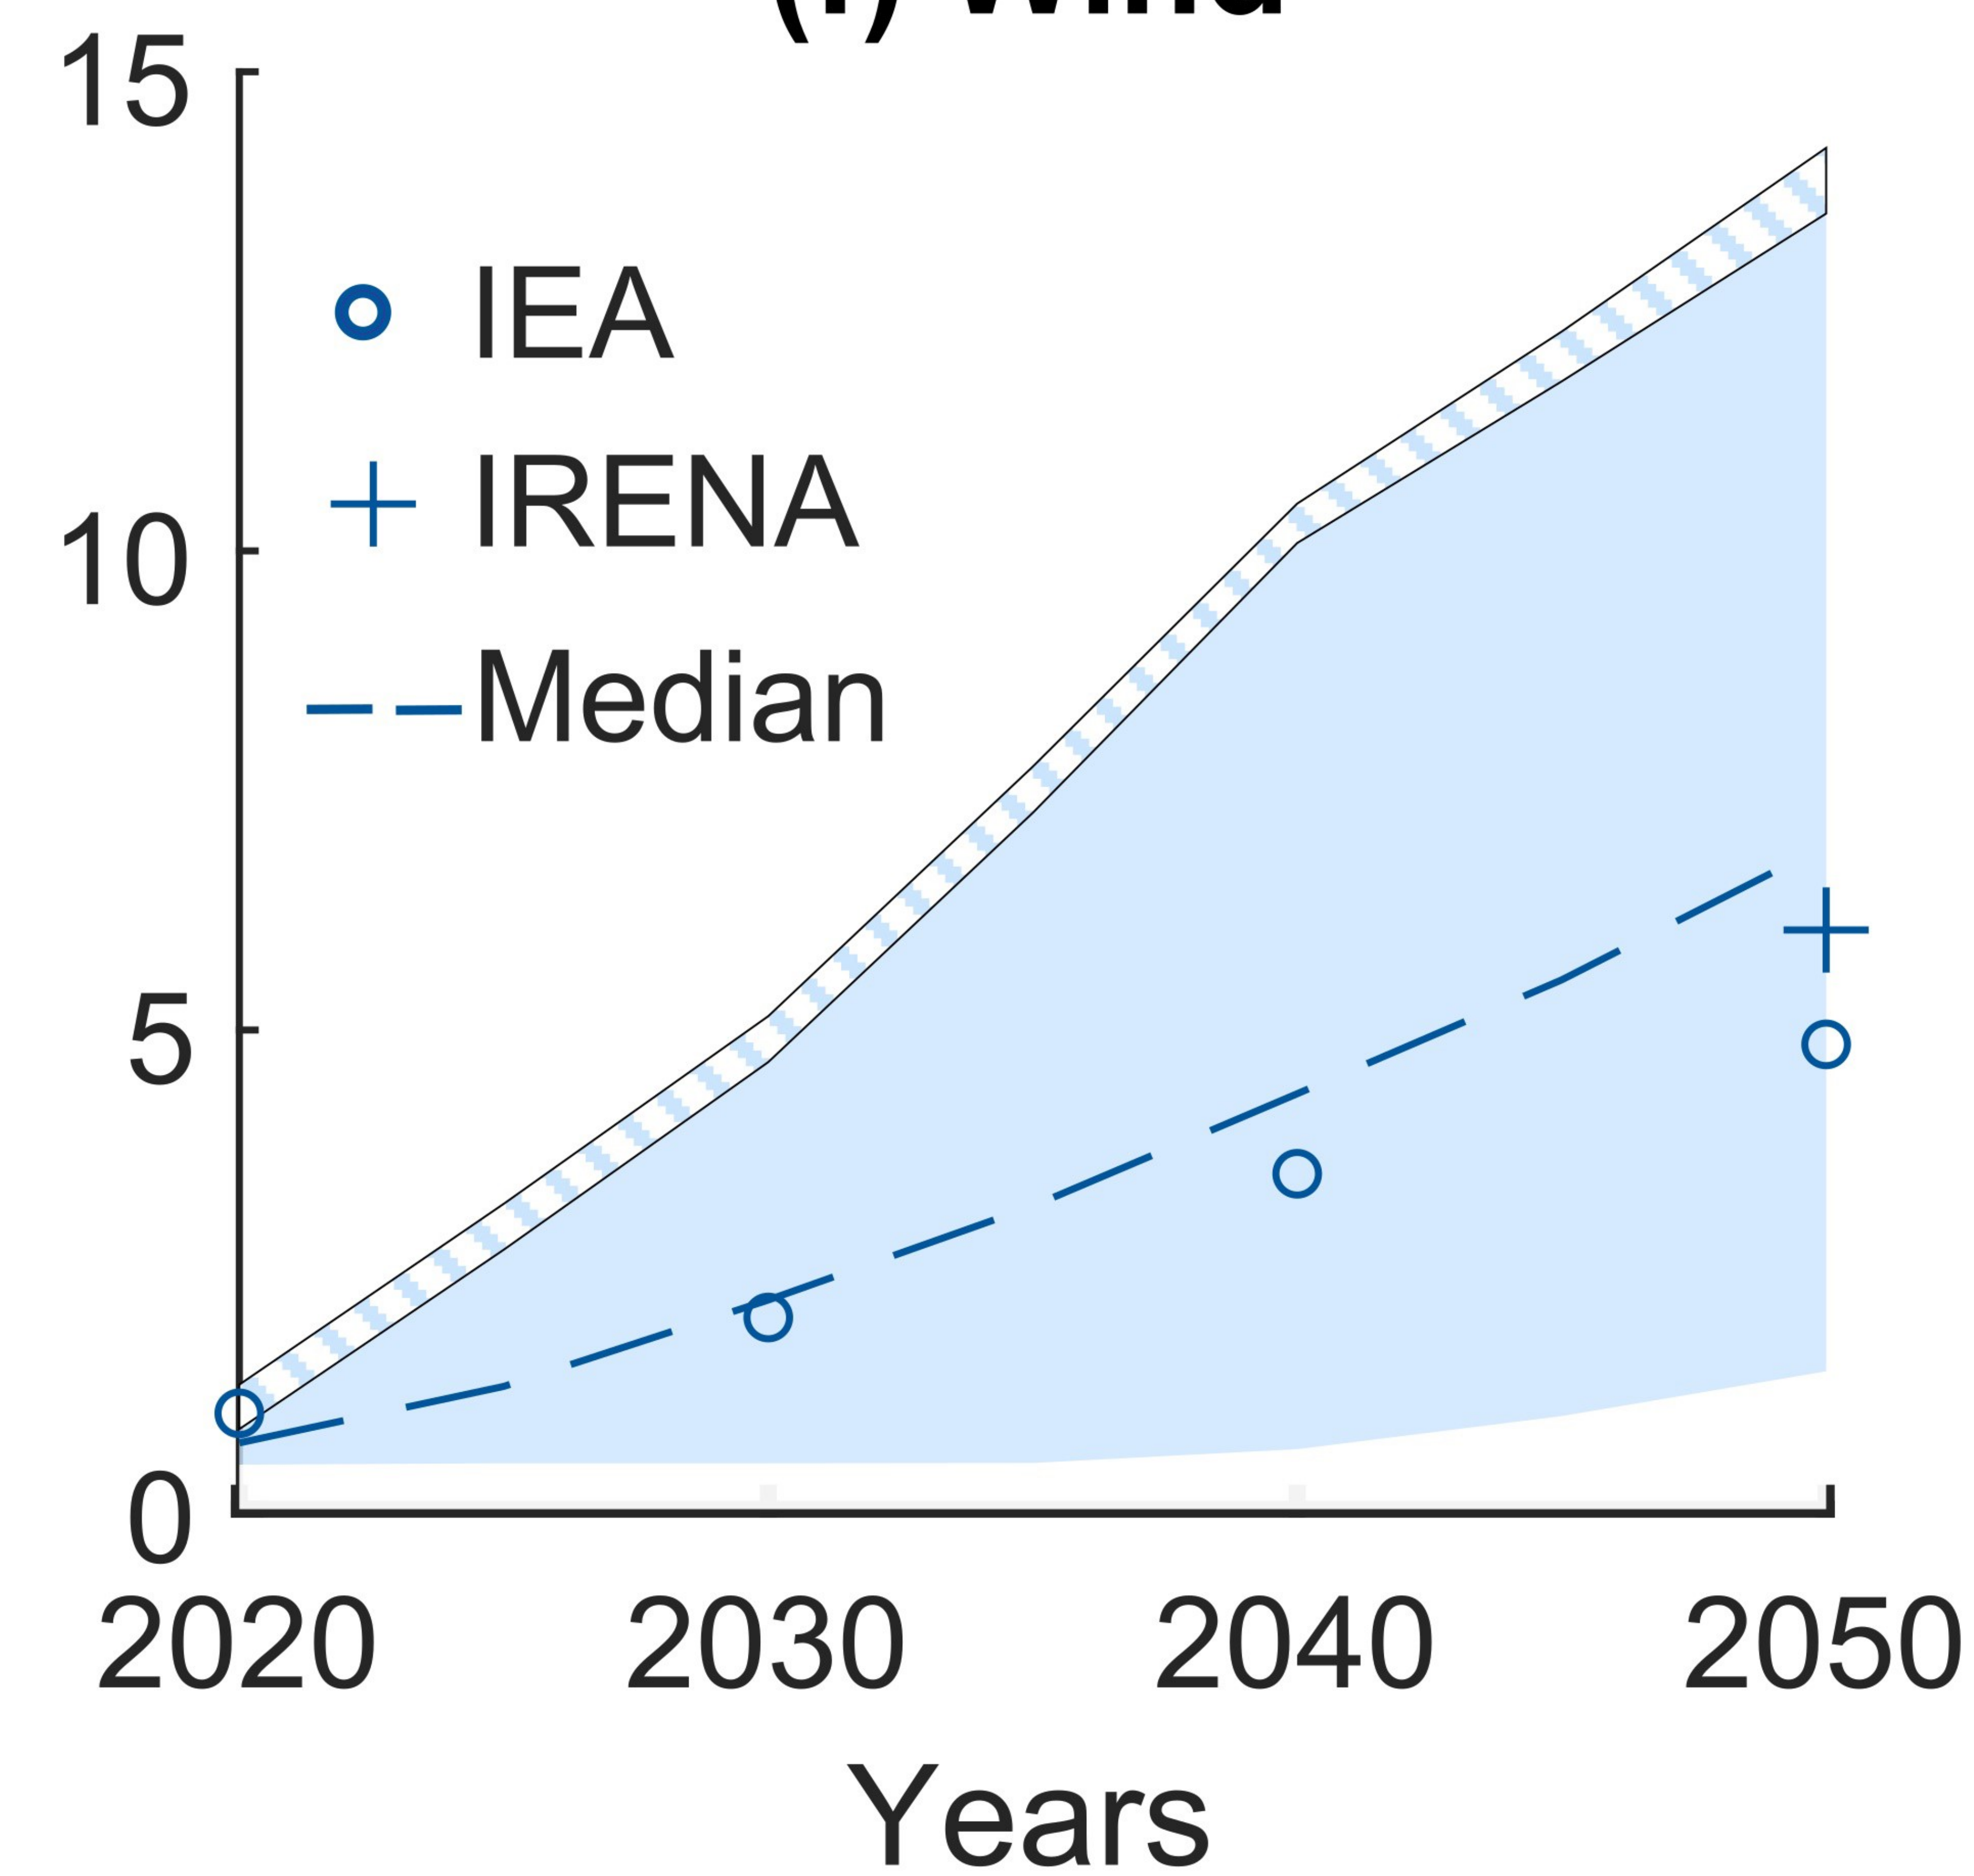

Supplement: d4ee00747f3.pdf [file d4ee00747f3.pdf]

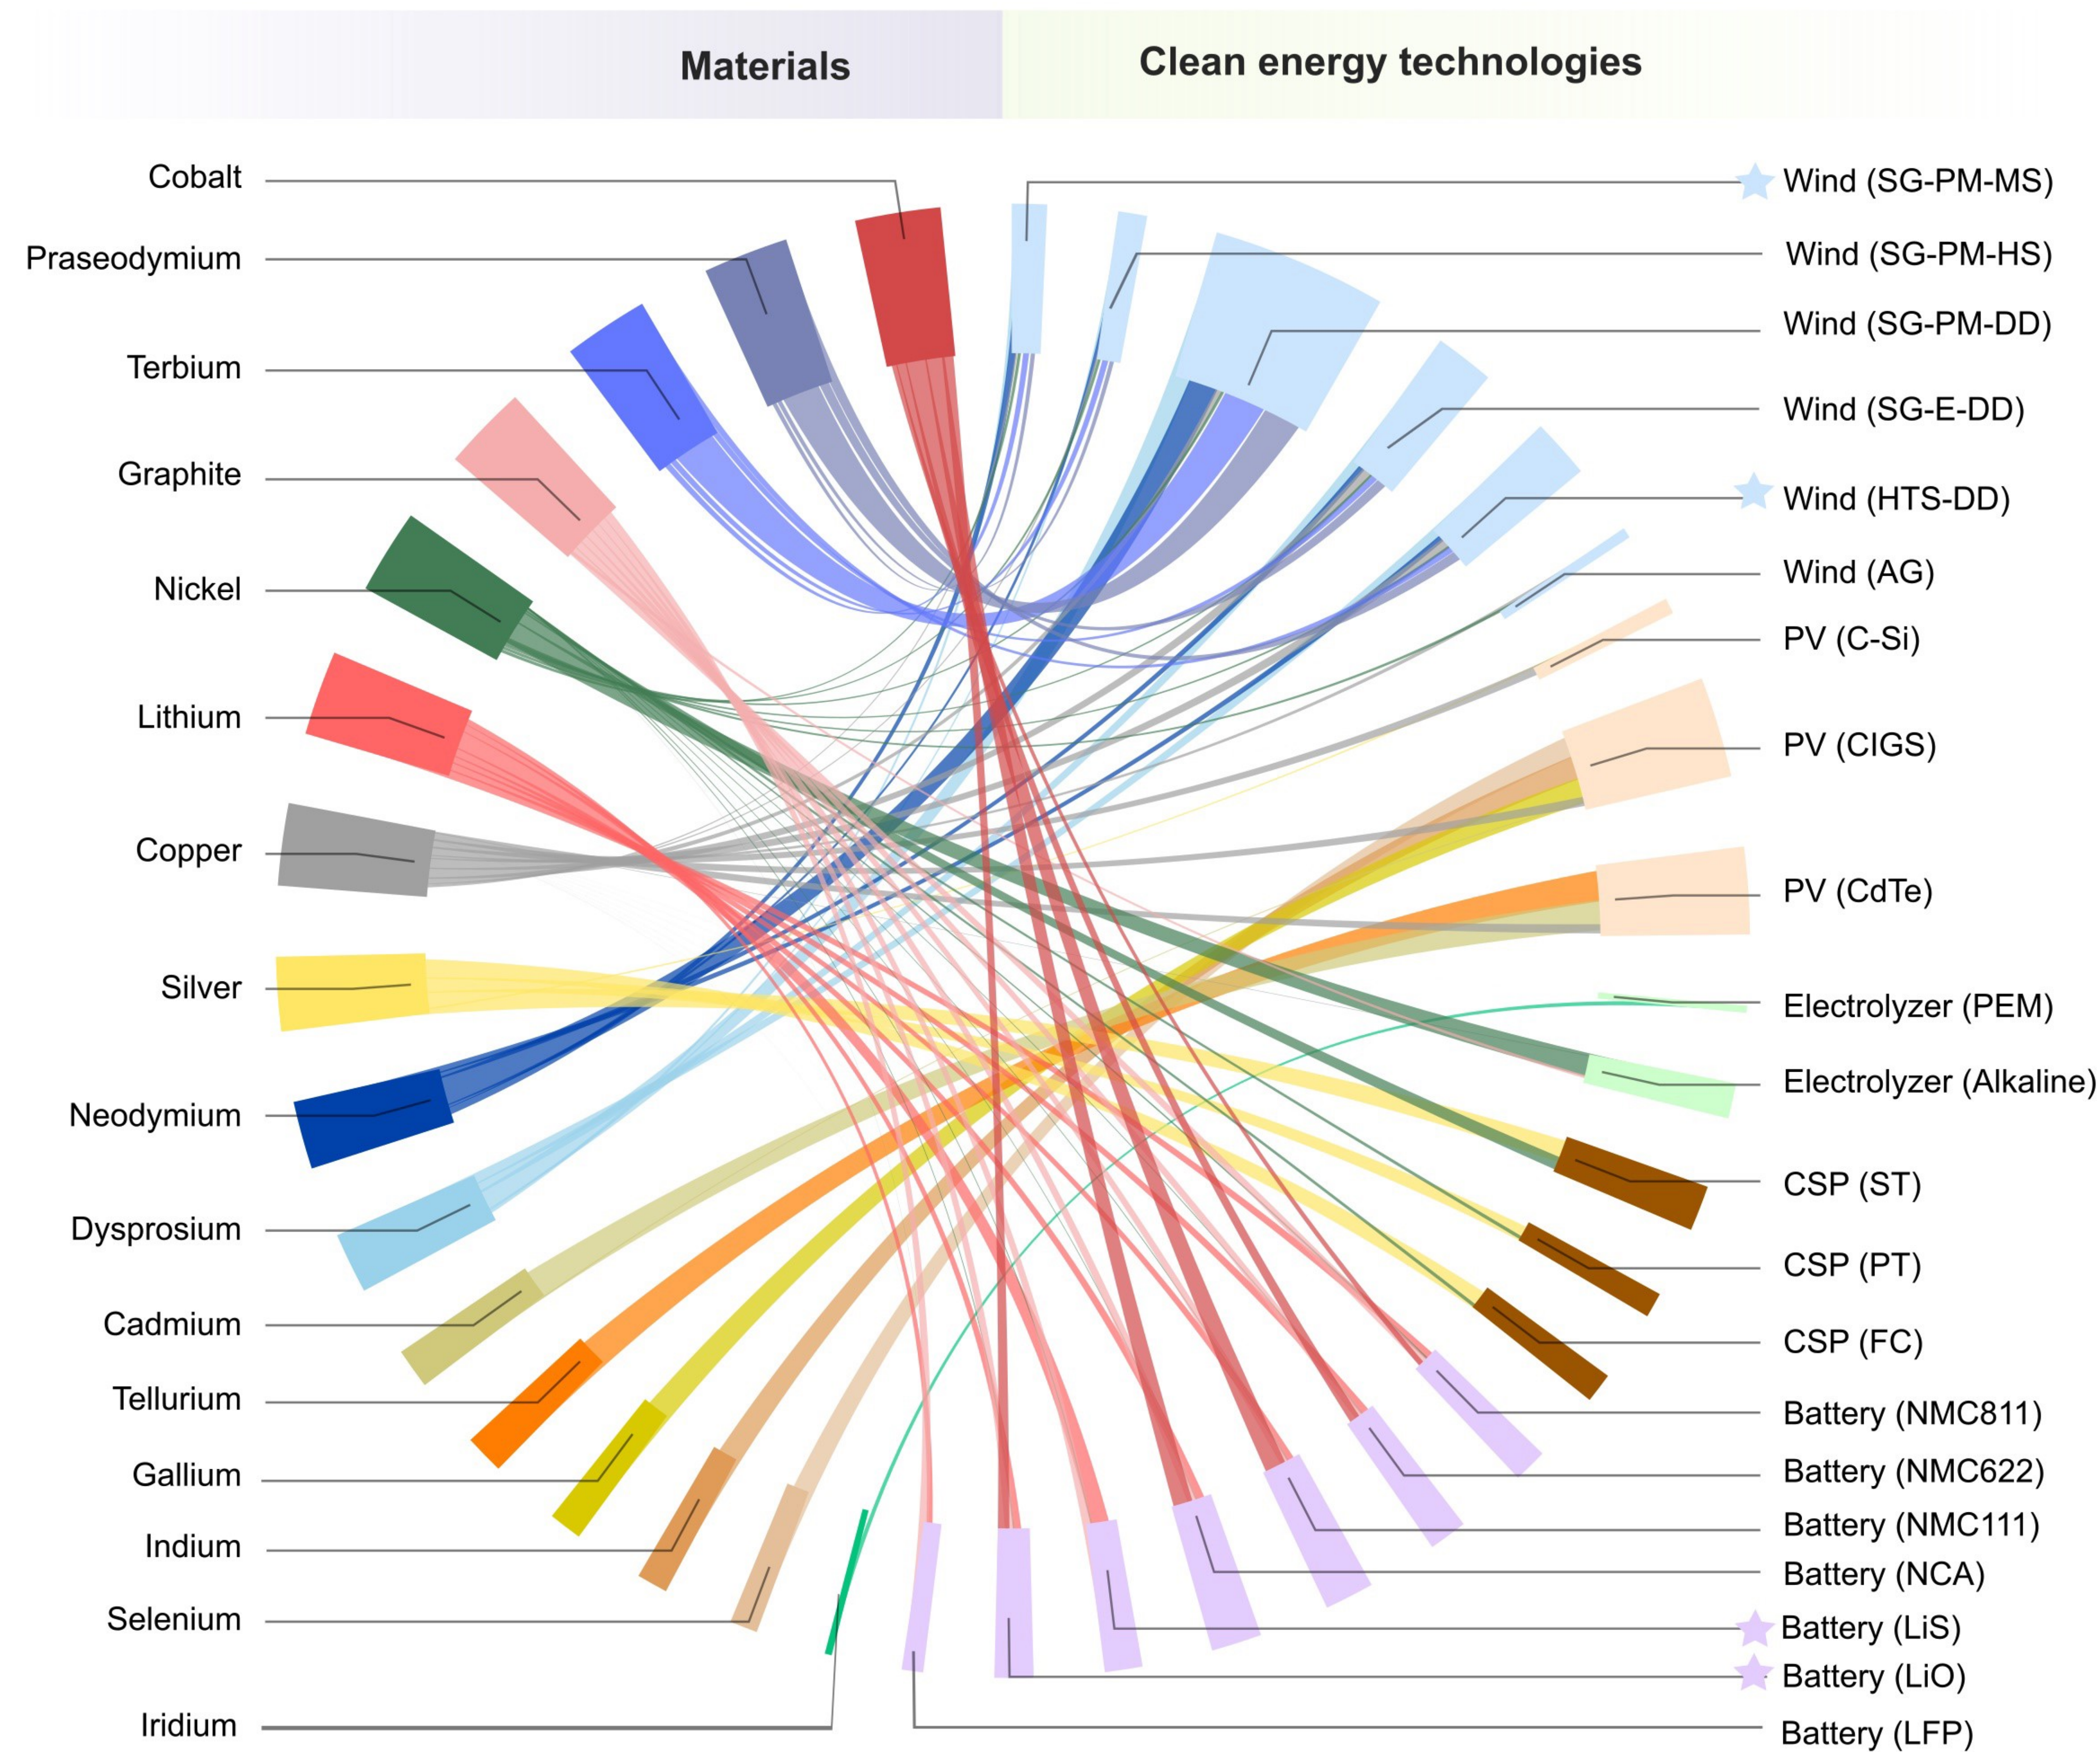

Supplement: d4ee00747f5.pdf [file d4ee00747f5.pdf]

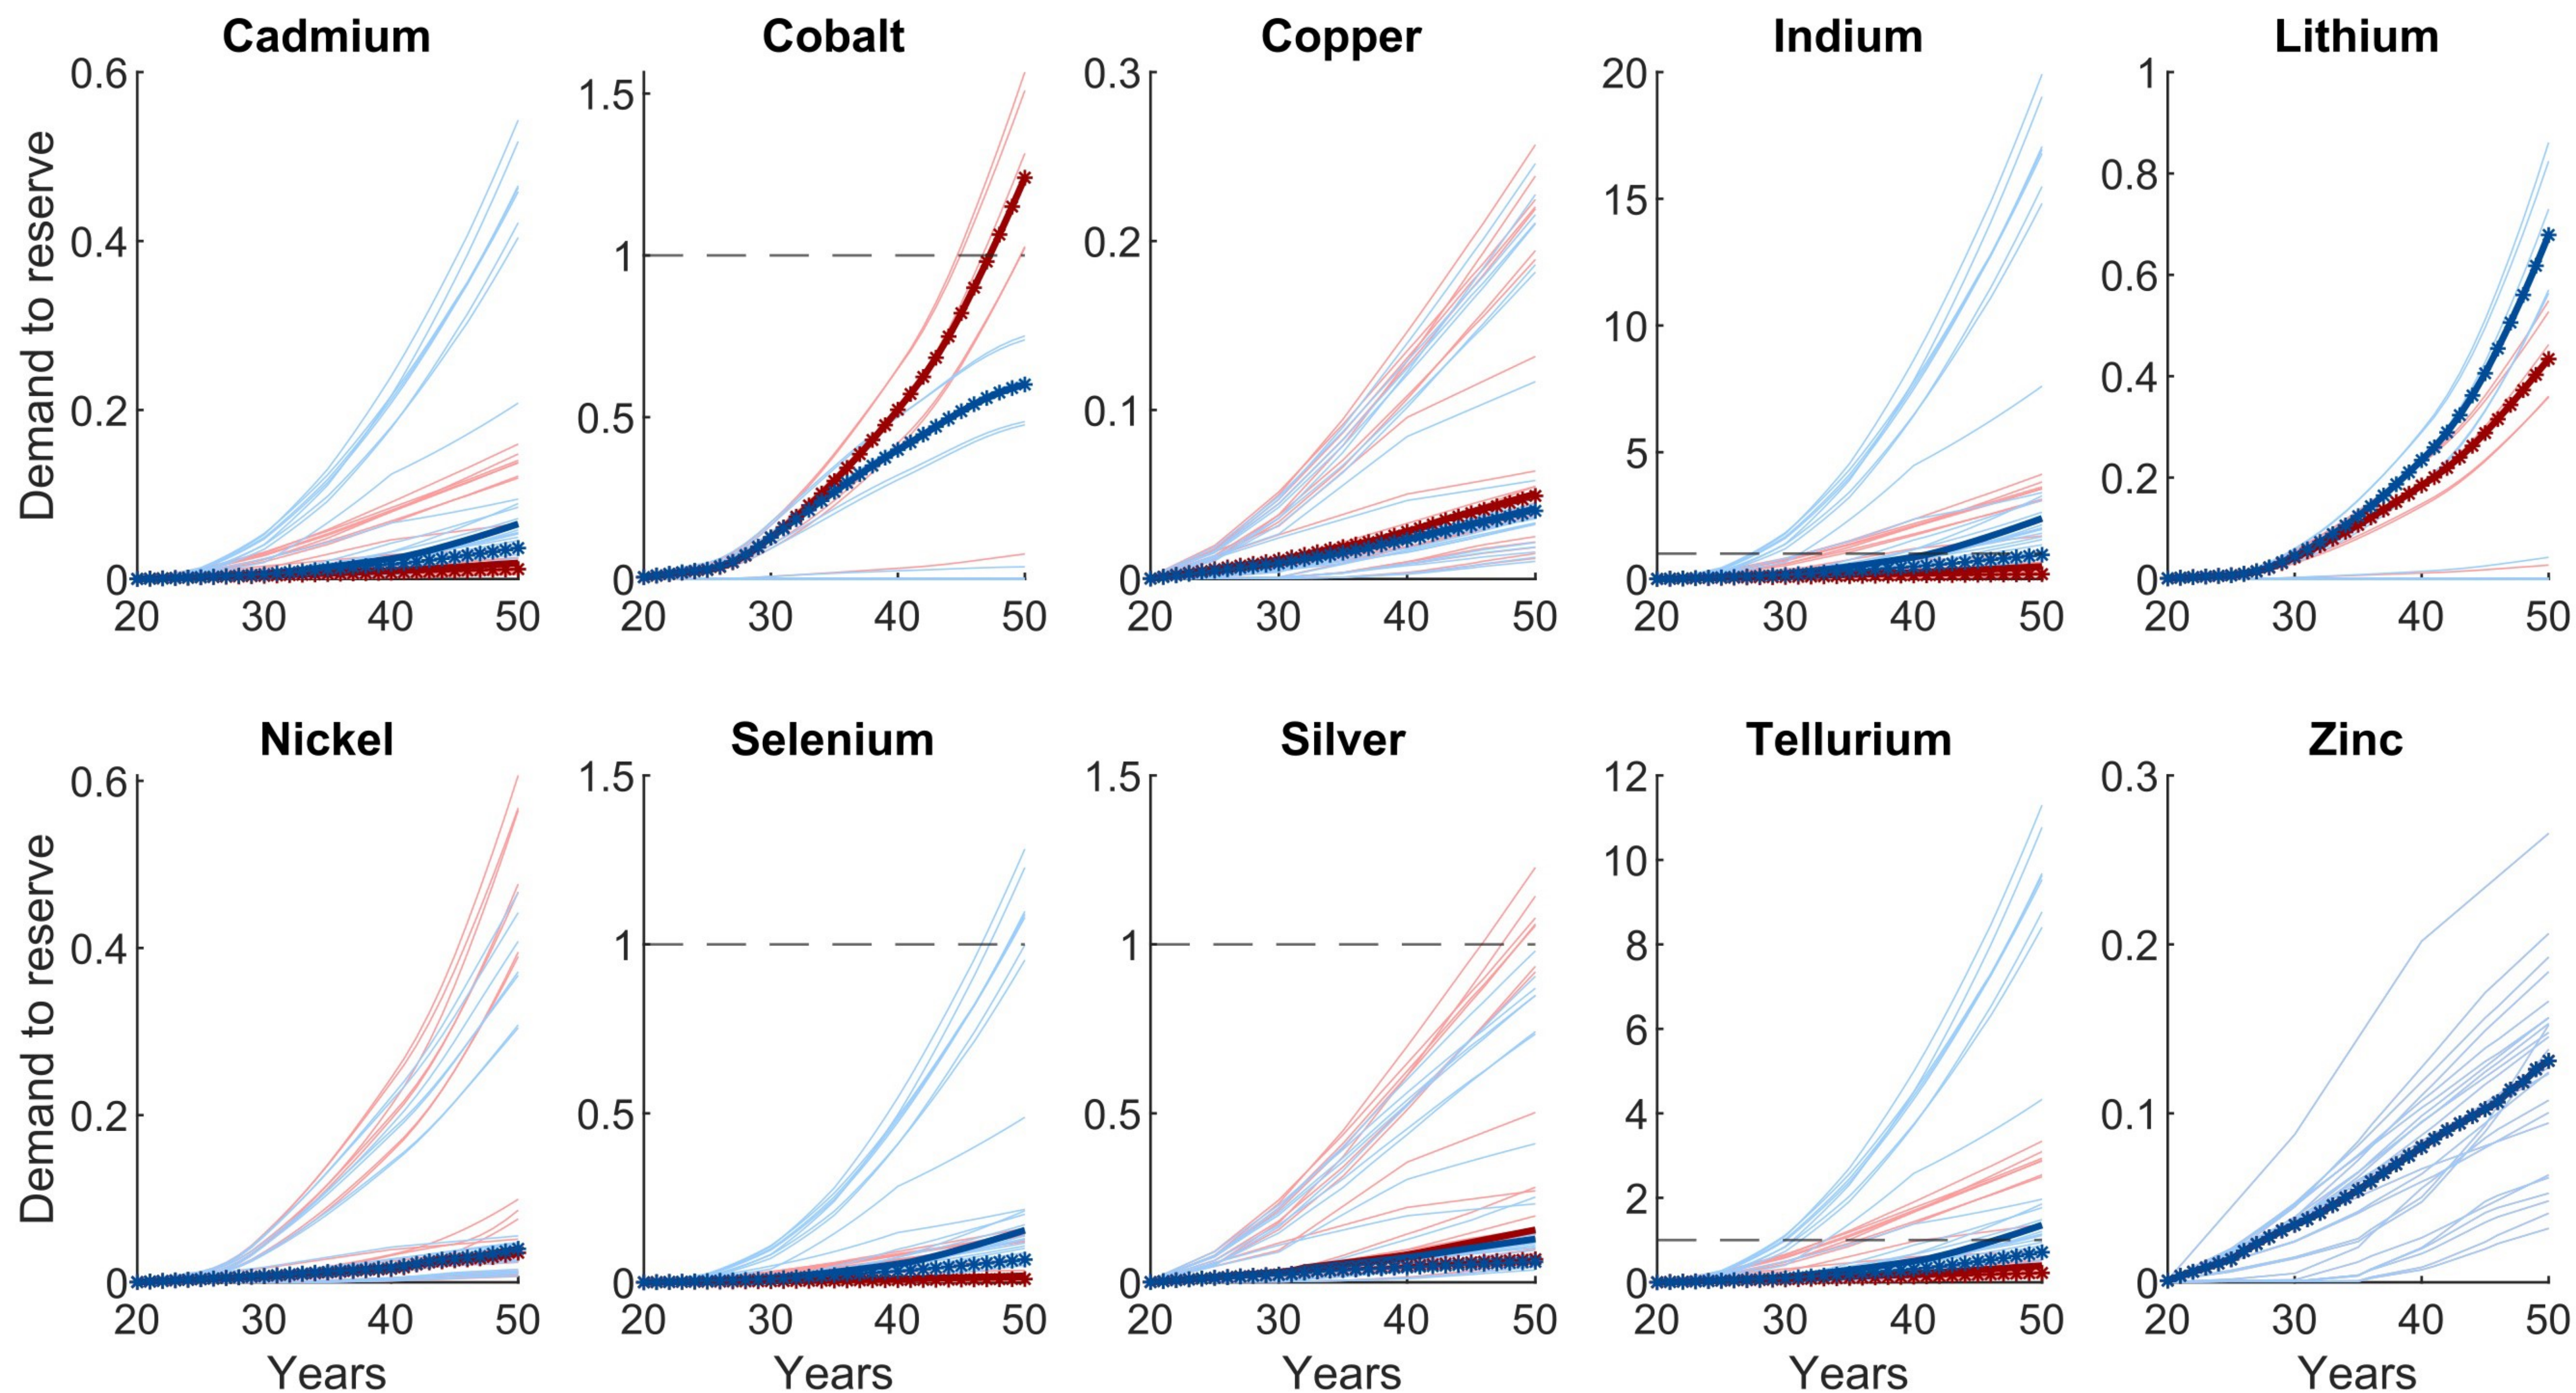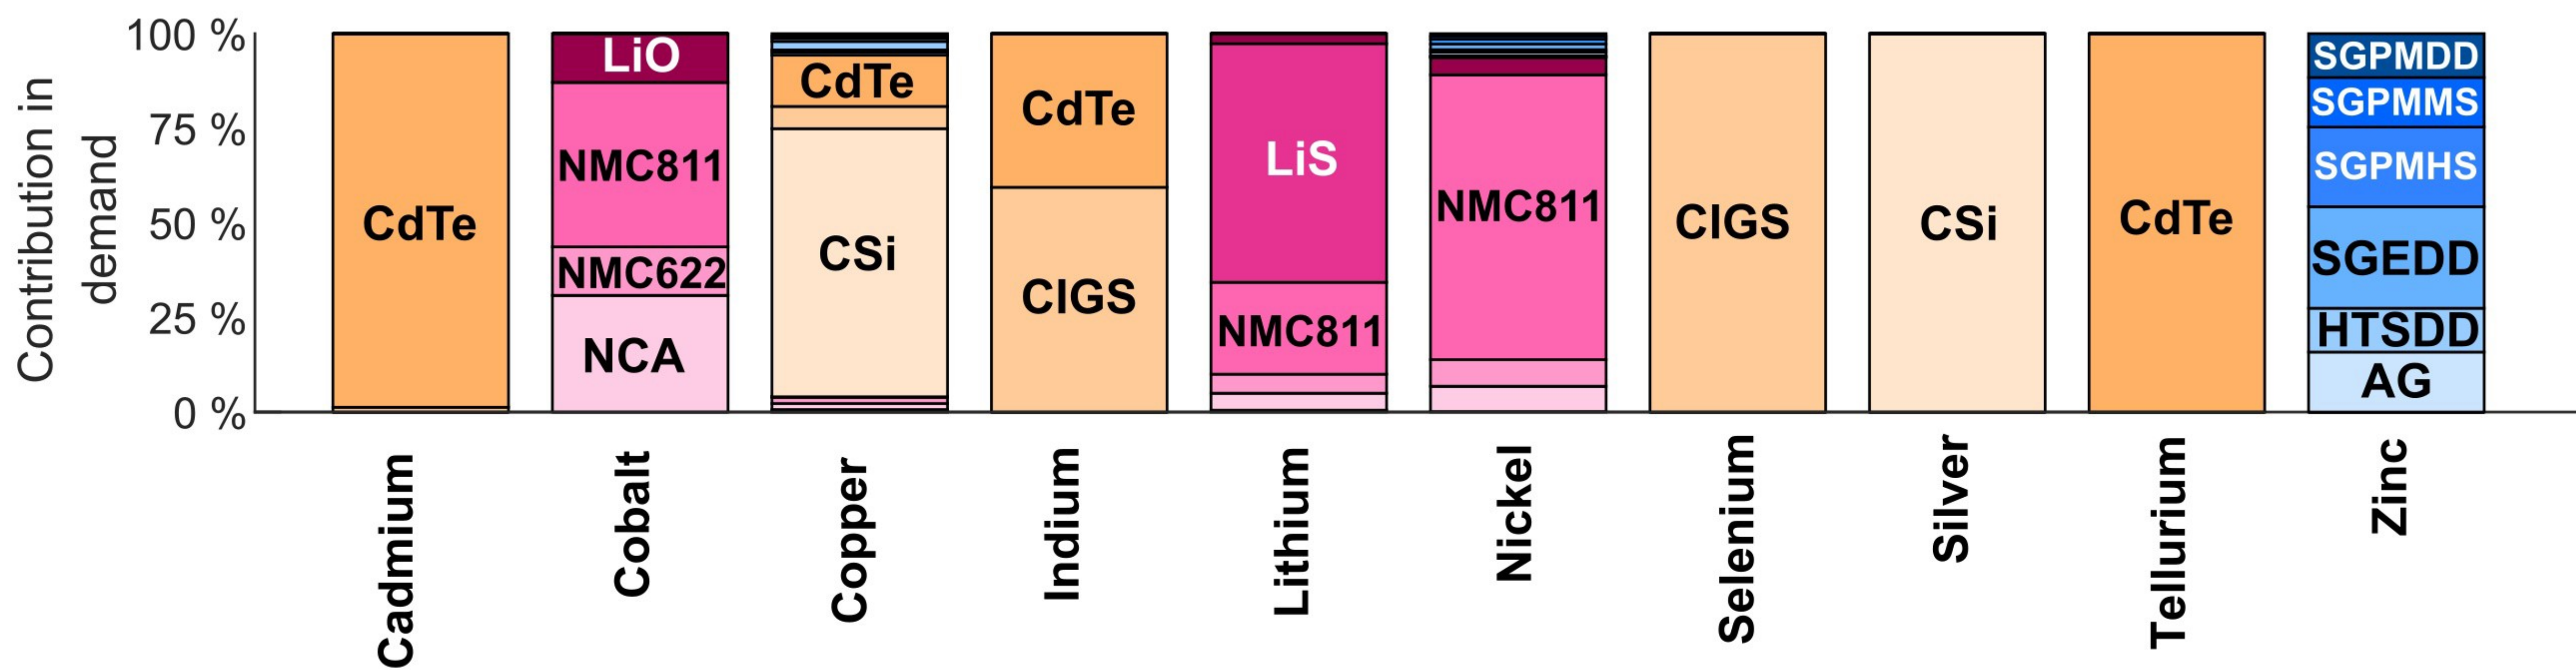

Supplement: d4ee00747f6.pdf [file d4ee00747f6.pdf]

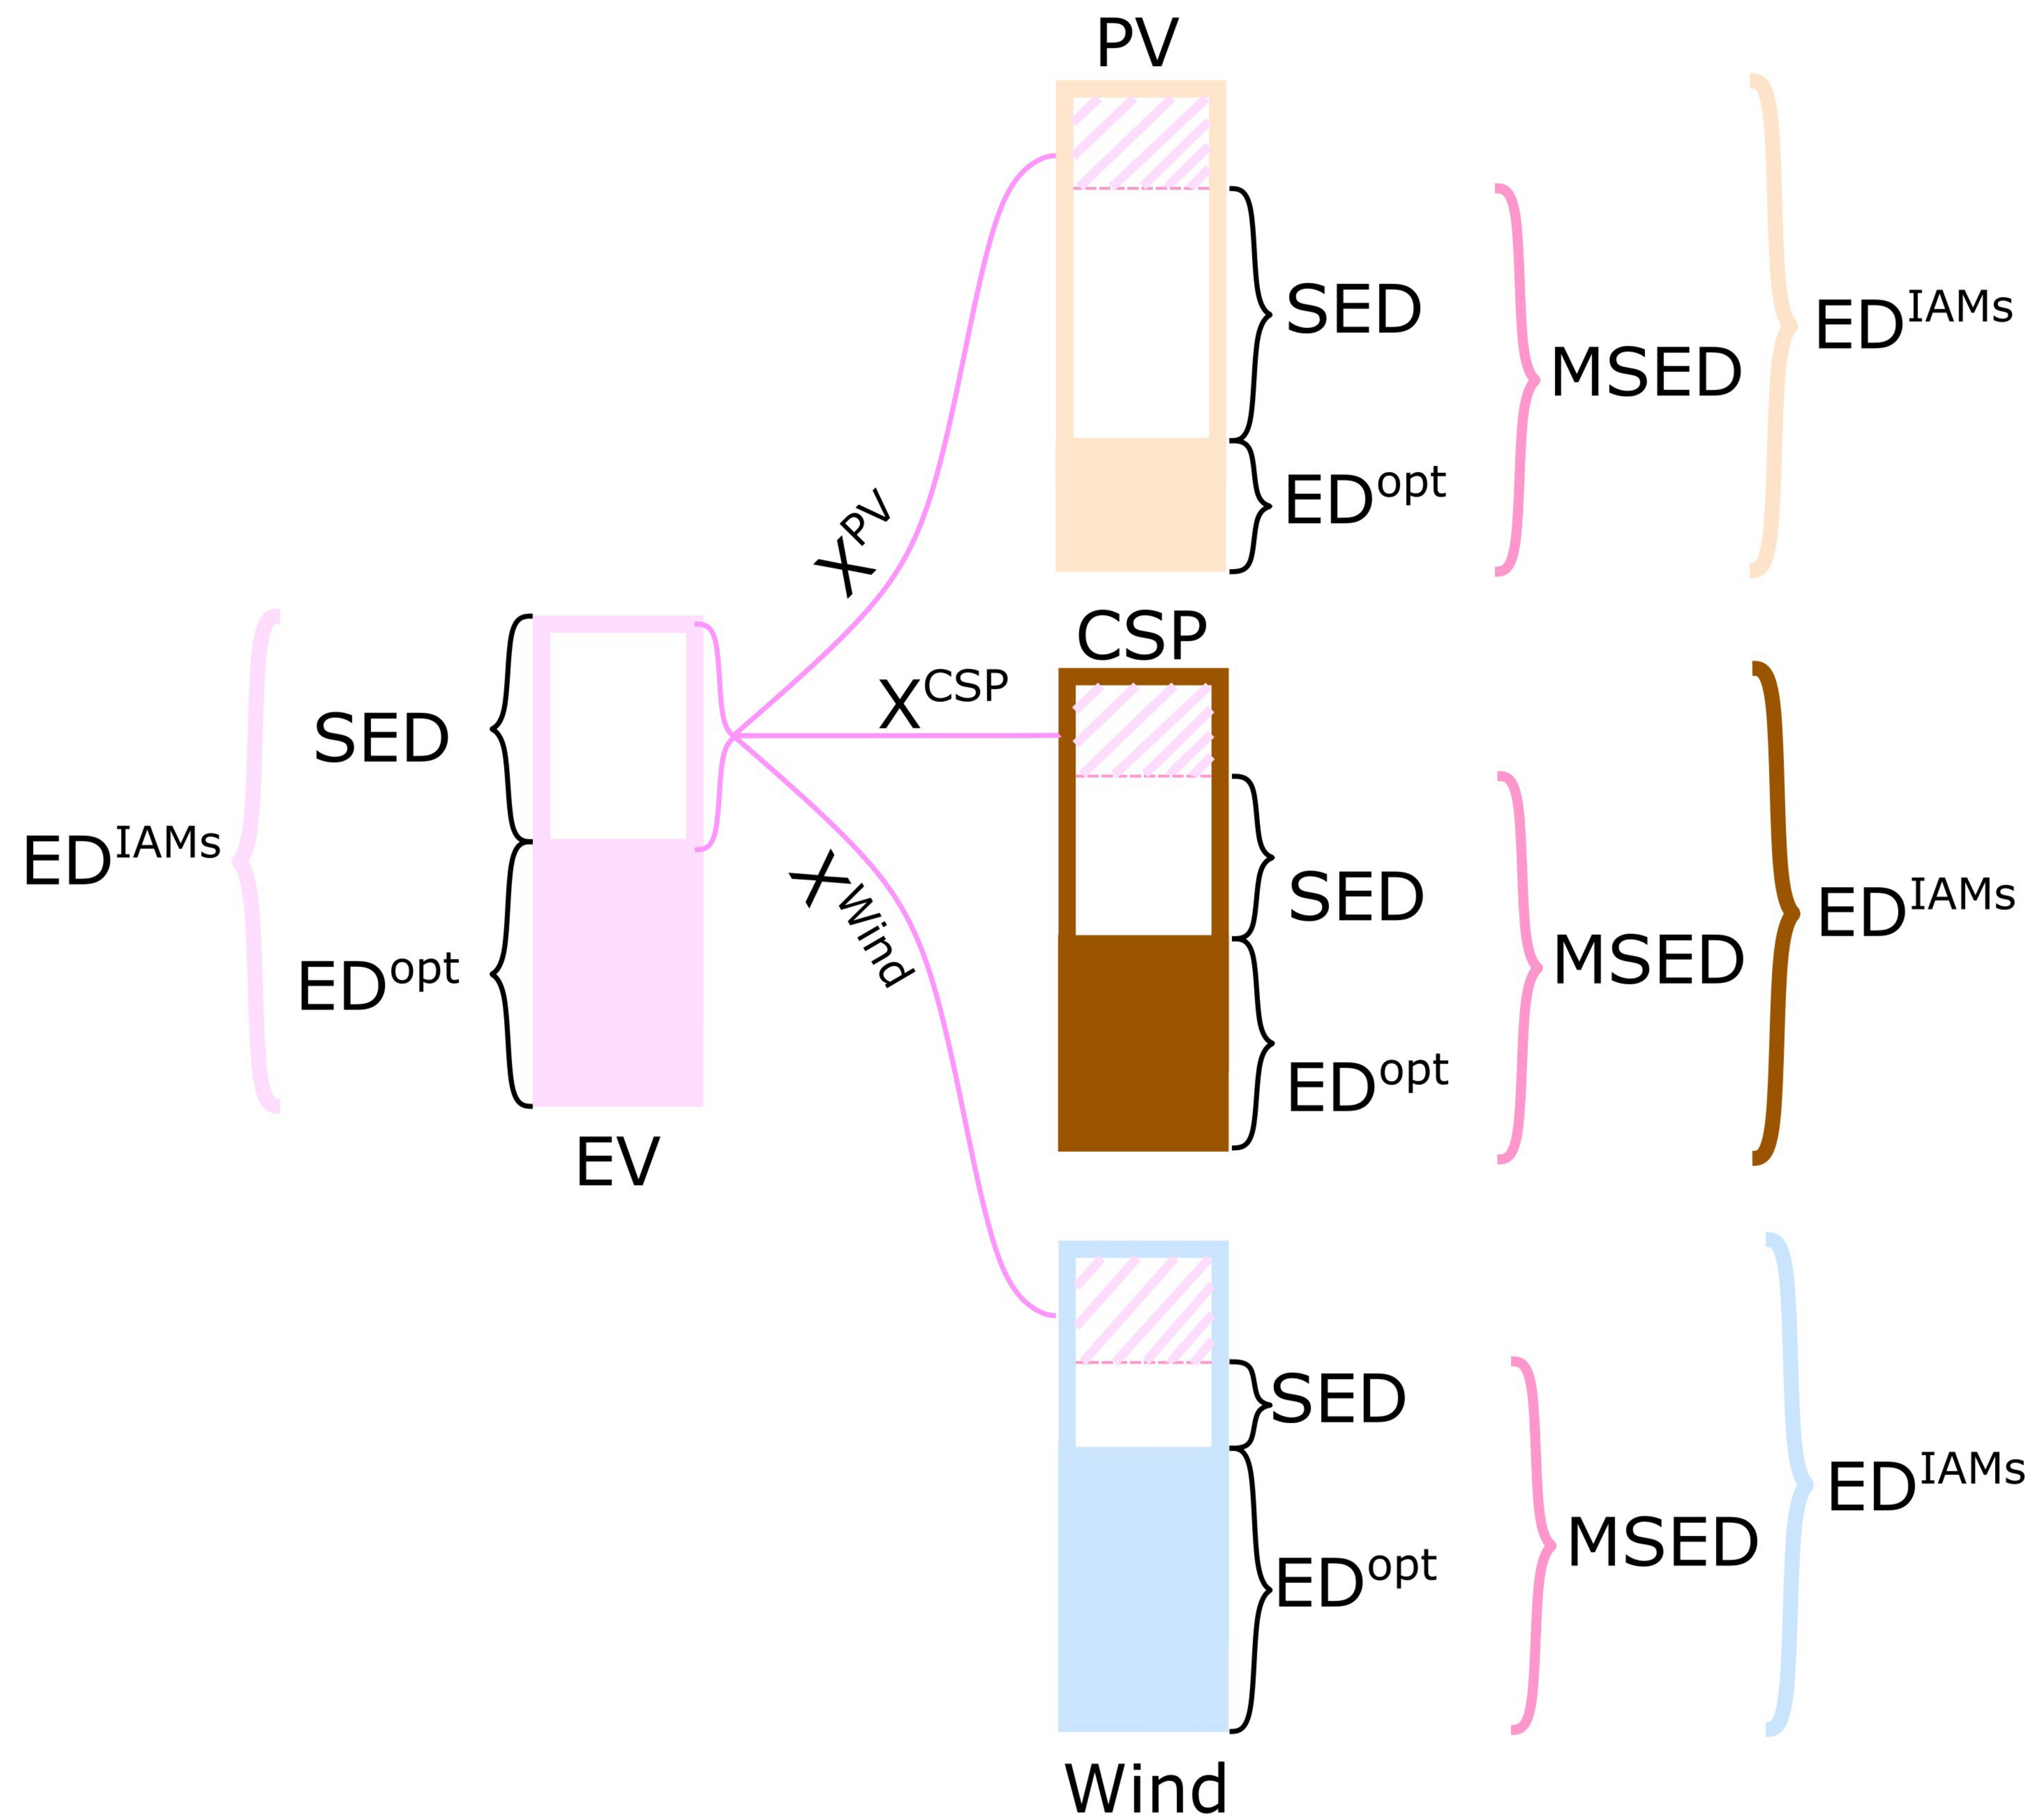

Supplement: d4ee00747f8.pdf [file d4ee00747f8.pdf]
